1 **The Transcriptional landscape of *Streptococcus pneumoniae* reveals a complex operon**  
2 **architecture and abundant riboregulation critical for growth and virulence**

3

4 **Indu Warriert, Nikhil Ram-Mohant, Zeyu Zhu, Ariana Hazery, Michelle M Meyer\*, Tim**  
5 **van Opijnen\***

6

7

8

9 Biology Department, Boston College, Chestnut Hill, MA, USA

10

11 † Equal contribution

12 \* Corresponding author

13

14 E-mail Addresses:

15

16 MMM: m.meyer@bc.edu

17 TvO: vanopijn@bc.edu

18

19 Keywords:

20 RNA-Seq

21 term-seq

22 5'end-seq

23 Riboregulation

24 sRNA

25 transcriptional landscape

26 operon architecture

27 *Streptococcus pneumoniae*

28

29

30

31

## 32 **Abstract**

33 Efficient and highly organized transcription initiation and termination is fundamental to an  
34 organism's ability to survive, proliferate, and quickly respond to its environment. Over the last  
35 decade, our simplistic outlook of bacterial transcriptional regulation and architecture has evolved  
36 to include stimulus-responsive regulation by untranslated RNA and the formation of alternate  
37 transcriptional units. In this study, we map the transcriptional landscape of the bacterial pathogen  
38 *Streptococcus pneumoniae* by applying a combination of high-throughput RNA-sequencing  
39 techniques. Our study reveals a complex transcriptome wherein environment-responsive  
40 alternate transcriptional units are observed within operons stemming from internal transcription  
41 start sites (TSS) and transcription terminators (TTS) suggesting that more fine-tuning of  
42 regulation occurs than previously thought. Additionally, we identify many putative *cis*-regulatory  
43 RNA elements and riboswitches within 5'-untranslated regions (5'-UTR) of genes. By  
44 integrating TSSs and TTSs with independently collected RNA-Seq datasets from a variety of  
45 conditions, we establish the response of these regulators to changes in growth conditions and  
46 validate several of them. Furthermore, to determine the importance of ribo-regulation by 5'-UTR  
47 elements for *in vivo* virulence, we show that the *pyrR* regulatory element is essential for survival,  
48 successful colonization and infection in mice suggesting that such RNA elements are potential  
49 drug targets. Importantly, we show that our approach of combining high-throughput sequencing  
50 with *in vivo* experiments can reconstruct a global understanding of regulation, but also pave the  
51 way for discovery of compounds that target (ribo-)regulators to mitigate virulence and antibiotic  
52 resistance.

53

## 54 **Introduction**

55 The transcriptional architecture of bacterial genomes is far more complex than originally  
56 proposed. The classical model of an operon describes a group of genes under the control of a  
57 regulatory protein where transcription results in a polycistronic mRNA with a single  
58 transcription start site (TSS) and a single transcription terminator site (TTS) [1]. However, many  
59 individual examples have established that the same operon may encode alternative  
60 transcriptional units under varying environmental conditions [2,3]. Furthermore, advancements  
61 in sequencing technology that enable highly accurate mapping of TSSs and TTSs on a genome-  
62 wide level have demonstrated that the number of TSSs and TTSs can significantly exceed the  
63 number of operons [4]. Thus it seems likely that the bacterial transcriptional landscape, or the  
64 genome-wide map of all possible transcriptional units, is shaped by an operon architecture that  
65 encodes many TSSs and TTSs within single operons, thus significantly increasing complexity  
66 with the objective of enabling diverse transcriptional outcomes [5,6].

67

68 To achieve a complex landscape of alternative transcriptional units, transcriptional regulation  
69 occurs on multiple levels. In addition to the many protein activators and repressors that control  
70 transcription initiation, there are also many non-coding RNAs (ncRNAs), including both small  
71 ncRNAs (sRNAs) and highly structured portions of mRNAs that play essential roles as  
72 regulatory elements controlling metabolism, stress-responses, and virulence [7,8]. *Trans* – acting  
73 small RNAs (sRNAs) allow selective degradation or translation of specific mRNAs [9] and *cis* –  
74 acting mRNA structures, such as riboswitches, interact with small molecules including, metal  
75 ions, and protein ligands to affect expression of downstream genes by regulating transcription  
76 attenuation or translation inhibition [10]. RNA regulation has been shown to play a key role in

77 shaping the transcriptional landscape of a wide range of pathogenic bacteria including  
78 *Staphylococcus aureus*, *Listeria monocytogenes*, *Helicobacter pylori*, and several strains of  
79 *Streptococci* [6,11-19]. Several RNA regulators have been validated and associated with  
80 pathogenicity and virulence [20,21], and could be used as highly specific druggable targets  
81 [22,23], however, only a select set of regulators have been targeted to date [24,25].

82  
83 *Streptococcus pneumoniae* is a major causative agent of otitis media, meningitis, pneumonia, and  
84 bacteremia. It causes 1.2 million cases of drug-resistant infections in the US annually and results  
85 in ~1 million deaths per year worldwide [26-28]. While high-resolution transcriptional mapping  
86 data are available for other *Streptococcus* species, these studies have shown limited experimental  
87 validation [17], or have focused primarily on the role of sRNAs in virulence [29]. Additionally,  
88 previous studies of the *S. pneumoniae* transcriptome have demonstrated the presence of ncRNA  
89 regulators and assessed their roles in infection and competence, however, these studies also  
90 largely focused on sRNAs [13,15,30]. Thus, while potentially incredibly valuable, a high-  
91 resolution validated map of the genome-wide transcriptional landscape for *S. pneumoniae* is not  
92 available.

93  
94 Here a comprehensive characterization of the *S. pneumoniae* TIGR4 transcriptional landscape is  
95 created using RNA-Seq [31], 5' end-Seq [19], and term-seq (3'-end sequencing) [32]. We obtain  
96 a global transcript coverage map, identifying all TSSs, and all TTSs, which highlights a highly  
97 complex *S. pneumoniae* transcriptional landscape including many operons with multiple TSSs  
98 and TTSs. Furthermore, we demonstrate how TSS and TTS mapping under one set of conditions  
99 can be leveraged to analyze independently obtained RNA-Seq data collected under a variety of

100 conditions, and we experimentally validate this approach with several cis-acting RNA regulators.  
101 Finally, we demonstrate that the functionality provided by the RNA *cis* – regulator *pyrR* is  
102 critical for *S. pneumoniae in vivo* in a mouse infection model. Importantly, our work  
103 demonstrates how a variety of high-throughput sequencing efforts can be combined to map out a  
104 comprehensive transcriptional landscape for a bacterial pathogen as well as identify potentially  
105 druggable ncRNA targets.

106

## 107 **Results:**

108 *Streptococcus pneumoniae* has a complex transcriptional landscape.

109 To characterize the transcriptional landscape of *Streptococcus pneumoniae* TIGR4 (T4), we first  
110 determined transcript boundaries by mapping transcription start (TSSs) and termination sites  
111 (TTSs) from 5' and 3' end sequencing reads obtained from exponential growth (Fig 1A and Fig  
112 1B). For the 2341 annotated genes in T4, a total of 1597 TSSs and 1330 TTSs were identified, as  
113 well as 236 antisense terminators suggesting extensive antisense regulation (Fig 2, S1 and S2  
114 Tables). RNA-Seq based clustering of genes with Rockhopper [33] detected 773 single gene  
115 operons and grouped 1512 genes into 474 multi-gene operons (S3 Table, and Fig 3). We  
116 classified operons into five categories based on the number of internal TSSs and TTSs (Fig 2).  
117 The majority of *S. pneumoniae* genes are independent transcriptional units with a single TSS and  
118 TTS (simple operons) (Fig 3A). Traditional operons with multiple genes and a single TSS and  
119 TTS make up 5% of the operons, while multiTSS, and multiTTS operons make up 4% and 3% of  
120 transcriptional units respectively. However, complex operons (most of which consist of two  
121 genes) with multiple TSSs and TTSs are the second largest category comprising 26% of all  
122 operons (Fig 3A and Fig 3B). Most complex operons are defined by a secondary internal TSS

123 and TTS, however there are several significantly more complex examples where the operon  
124 contains multiple TSSs and TTSs (Fig 3B), indicating a highly intricate system of possible  
125 transcripts.

126  
127 Since our data revealed many operons with complex structure, we sought to corroborate specific  
128 examples using additional data sources. One complex operon we identified, which is also present  
129 in existing databases of operon structure [5,34], consists of 9 genes (SP1018-SP1026) with  
130 six internal TSSs and eight TTSs (Fig 4A). In addition, this operon displays unequal and  
131 complex gene expression patterns when independently collected RNA-Seq data from diverse  
132 media conditions is mapped to the transcript. In poor growth medium (MCDM) the operon can  
133 be split into two parts based on expression, where the last five genes in the operon (SP1022-  
134 1026) are expressed significantly higher than the first four genes (SP1018-1021), while in rich  
135 medium (SDMM) the read depth across the operon is similar. This observation corroborates the  
136 role of the internal regulatory mechanisms for maintaining differences in gene expression  
137 between different growth conditions.

138  
139 A second validation of our data and analysis approach derives largely from existing low-  
140 throughput experiments. The mal regulon is a multiple operon system under the control of a  
141 single protein, malR (SP2112), which downregulates regulon expression at the malM (SP2107)  
142 promoter. Our data shows that the mal regulon includes operons belonging to three different  
143 categories, a traditional operon (malAR/SP2111-2112), a multiTTS operon (malMP/SP2016-  
144 2107) and a complex operon (malXCD/SP2108-2110). From the RNA-Seq coverage maps it is  
145 clear that the three operons can be differentially controlled and expressed in rich vs poor media

146 (Fig 4B). Furthermore, the TSS and TTS identified by our analysis reveal features that have been  
147 previously described in lower throughput assays [24]. Thus, although our data may highlight  
148 many examples of complex transcriptional architecture, these examples are verifiable through the  
149 incorporation of additional RNA-Seq data, and where applicable are consistent with low-  
150 throughput studies done in the past.

151

### 152 *Genome-wide identification and pan-genome wide conservation of regulatory RNAs.*

153 To identify RNA regulators that act through premature transcription termination, we compiled 3'  
154 end sequencing reads upstream of translational start sites, allowing a minimum 5'-untranslated  
155 region (UTR) length of 70 bases. We detected 565 such early TTS sites that represent putative  
156 regulatory elements (represented in black (TSS) and orange (early TTS) in the inner band of Fig  
157 2). By screening these regulatory elements against 380 published *S. pneumoniae* strains [35],  
158 covering a large part of the pan-genome, we found that 20 candidates (~4%) were conserved  
159 across all genomes, 171 (45%) were identified in at least 350 genomes, 68 (~12%) candidates  
160 were identified in fewer than half of the genomes (S1A Fig), while a single candidate, identified  
161 upstream of a transposase, was found only in T4. Interestingly, 415 (73%) candidates were found  
162 as single copies within a genome, while the others had varying copy numbers ranging from 2 to  
163 29. Evolutionary distance of each candidate cluster was estimated using MEGA-CC [36], which  
164 reveals that each cluster is made of highly similar, if not identical, sequences (S1B Fig).

165

166 The candidate RNAs were compared to previously identified *S. pneumoniae* small RNAs and to  
167 homologs of characterized structured RNA families (including a variety of riboswitches and  
168 other *cis*-regulatory structured RNAs). A total of 111 candidates overlap with previously

169 identified *S. pneumoniae* small RNAs (sRNAs), 86 out of the 88 intergenic sRNAs described in  
170 [13] and 32, with an additional 24 within 150 nucleotides, out of 89 described by [15] (S5 Table).  
171 To identify homologs of characterized RNA families in T4 we used Infernal (an RNA specific  
172 homology search tool, [37]) to search the genome, which detected 51 of the 565 candidates, and  
173 3 out of the 6 regulatory elements experimentally validated in this work (S4 Table), indicating  
174 the existence of many novel regulatory elements in T4. However, the coordinates identified by  
175 Infernal do not always match with those identified by our methodology (S4 Table). For example,  
176 the 23S-methyl ncRNA identified by Infernal is found in T4 between coordinates 466473 and  
177 466568, and the regulatory element experimentally identified is found between coordinates  
178 466469 and 466579. All the Infernal identified ncRNAs overlapping with the candidates  
179 identified here are listed in S4 Table. On the other hand, in certain cases like the L1 regulator,  
180 the coordinates do not overlap at all. This could be due to the existence of a condition specific  
181 secondary TSSs that were not picked up in our growth conditions. Despite these exceptions, the  
182 majority of the Infernal identified ncRNAs families show complete overlap with the candidates.

183

184 *Leveraging RNA-Seq data collected under various conditions enables identification and*  
185 *validation of environment-responsive RNA regulators.*

186 We reasoned that since we mapped RNA-regulators by means of 5' end sequencing, we would be  
187 able to associate these regulators with specific growth conditions using environment dependent  
188 RNA-Seq data. To confirm the biological relevance of an RNA regulator and associate it with a  
189 specific condition one would expect to see a change in the 5' UTR coverage relative to the  
190 accompanying gene. For instance, if a regulator forms an early terminator the RNA-Seq  
191 coverage in the 5'UTR is relatively high, while the coverage in the controlled gene would be



192 much lower. Alternatively, if the environment relieves the formation of the early terminator the  
193 coverage across the 5'UTR and gene would become less skewed. To determine the applicability  
194 of this assumption we leveraged independently collected RNA-Seq data sampled under different  
195 nutrient conditions including, rich and poor media, and nutrient depletion conditions where a  
196 single nutrient was removed from the environment. RNA-Seq data were mapped to each putative  
197 regulatory region and coverage was calculated and averaged across the length of the 5' UTR  
198 regulatory element and the downstream gene. From our list of candidate 5'-UTR regulatory  
199 elements, 128 showed more than two fold change in read-through between rich and poor media,  
200 with the majority showing an increase in read-through in poor media. Five regulators from this  
201 list were validated by qRT-PCR (Fig 5A-B, S2 Fig), confirming that RNA-Seq data can indeed  
202 be used to identify conditions to which an RNA regulator responds.

203

204 Importantly, two of the validated regulators are known as the thiamine pyrophosphate (TPP) and  
205 flavin mononucleotide (FMN) riboswitches. In many bacteria the TPP riboswitch binds thiamine  
206 pyrophosphate and regulates thiamine biosynthesis and transport [38]. Similarly, the FMN  
207 riboswitch regulates biosynthesis and transport of riboflavin by binding to FMN [39]. While we  
208 validated that these riboswitches respond to poor media by increasing expression of their  
209 respective genes (Fig 5A-B) we suspected that this was due to depletion of each specific ligand  
210 in the poor media. Indeed, when poor media is supplemented either with thiamine or riboflavin,  
211 expression of the TPP or FMN controlled gene (SP0716 and SP0178 respectively) decreases by  
212 more than 3-fold, suggesting that the observed differences between rich and poor media can be  
213 attributed to the activity of these riboswitches.

214

215 In an attempt to validate the feasibility of directly associating RNA-regulators with a highly  
216 specific change in the environment we performed RNA-Seq in the presence and absence of  
217 uracil. One specific regulatory element that is sensitive to uracil is the pyrR RNA element, which  
218 in many bacteria regulates *de novo* pyrimidine nucleotide biosynthesis through a transcription  
219 attenuation mechanism mediated by the PyrR regulatory protein [40,41]. In the presence of the  
220 co-regulator UMP, PyrR binds to the 5' UTR of the *pyr* mRNA transcript (the pyrR RNA  
221 element) and disrupts the anti-terminator stem-loop thereby promoting the formation of a factor-  
222 independent transcription terminator resulting in reduced expression of downstream genes [40]  
223 (Fig 6A). In contrast, the co-regulator 5-phosphoribosyl-1-pyrophosphate (PRPP) antagonizes  
224 the action of UMP on termination by binding to the PyrR protein when UMP concentration is  
225 low [42] (Fig 6A). For *S. pneumoniae*, our data confirms that pyrR RNA elements are present in  
226 the 5' UTR of two *pyr* operons (SP1278-1276; SP0701-0702), and the uracil transporter  
227 (SP1286). Furthermore, in response to the absence of uracil the coverage across the two genes  
228 directly adjacent to the regulators (SP1278 and SP0701) and over the entire two operons  
229 increases drastically (Fig 6C), demonstrating that the regulatory elements effectively turn the  
230 genes/operons on, which we confirmed by qRT-PCR (Fig 6D, S3 Fig). Thus, while term-seq can  
231 be used to map novel regulatory RNA candidates on a genome-wide scale, RNA-Seq data can be  
232 leveraged, even in retrospect, to identify environmental conditions the regulator responds to.

233

234 *The pyr operon is regulated through the secondary structure of the 5' RNA leader-region, is*  
235 *essential for in vitro growth and in vivo virulence and can be directly manipulated.*

236 To further investigate the importance of the pyrR regulatory RNA element in growth, three  
237 different mutants were constructed that variably affect the 5' RNA secondary structure (Fig 7A):

238 1) mutation M1 interferes with the binding of PyrR to the *pyr* mRNA; 2) mutation M2 renders  
239 the regulatory element in an “always on” state by destabilizing the rho-independent terminator  
240 stem-loop structure that is formed in the presence of UMP; 3) M3 locks the terminator and  
241 creates an “always off” state (Fig 7A). Wild type and mutant strains were cultured in the  
242 presence or absence of uracil and the effect of the mutations on expression of SP1278 were  
243 assessed with qRT-PCR (Fig 7B). As expected, expression in the wild type decreased (9.5-fold)  
244 in the presence of uracil confirming the repressive effect of exogenous pyrimidine (Fig 7B) [43].  
245 M1, which should be insensitive to the presence of PyrR and its co-regulator UMP (Fig 7A) is  
246 indeed unresponsive to the presence of uracil (Fig 7B). M2 triggers constitutive expression of the  
247 *pyr* operon (Fig 7B) and M3 has a ~5-fold reduction in expression compared to the wild type  
248 regardless of the presence of uracil (Fig 7B).

249  
250 Previously we showed that the pyrimidine synthesis pathway in *S. pneumoniae* is partially  
251 regulated by a two-component system (SP2192-2193) and that genes in this pathway are  
252 important for growth [44]. To determine the importance of a functional *pyrR* regulatory RNA  
253 element in growth, we performed growth experiments with mutants M1, M2 and M3 in the  
254 absence and presence of uracil. These data suggest that a functional *pyrR* does not appear to be  
255 absolutely necessary. For instance, while M1 may have a slight growth defect when cultured in  
256 the absence of uracil, M2 has no growth defect in the presence or absence of uracil (Fig 8A-B).  
257 Although both mutations result in constitutive expression of the *pyr* operon, mutation M1 leads  
258 to higher expression (Fig 7B) indicating that overexpression of the *pyr* genes may result in  
259 accumulation of end products that are detrimental to the cell. Alternatively, the M2 *pyrR* RNA  
260 element can still bind excess UMP-bound PyrR (as its PyrR binding domain is intact) thus

261 reducing the effective concentration of UMP in the cell and thereby potential accumulation  
262 associated side-effects. Importantly, M3 has a severe growth defect compared to wild type in the  
263 absence of uracil (Fig 8A), which can be partially rescued upon addition of uracil (Fig 8B). This  
264 suggests that while a constitutive off-state is detrimental for the bacterium in the absence of  
265 uracil a constitutive on-state can be overcome, indicating that efficient transcriptional control  
266 may not be essential.

267

268 To determine whether we can manipulate the manner in which the *pyrR* RNA element affects  
269 growth, we determined growth in the presence of 5-Fluoroorotic acid (5-FOA), a pyrimidine  
270 analog. 5-FOA is converted into 5-Fluorouracil (5-FU) a potent inhibitor of thymidylate  
271 synthetase, whose activity is essential for DNA replication and repair [45]. Additionally, 5-FU  
272 competes with UMP for interacting with the PyrR protein [46]. 5-FU can thus work as a decoy,  
273 signaling that UMP is present in the cell; triggering the formation of a terminator and reducing  
274 expression of the *pyr* operon. The wild type strain displayed a severe growth defect in the  
275 presence of 5-FOA (Fig 8C&D), while M1 (which should not interact with PyrR and should thus  
276 be largely insensitive to the presence of 5-FOA) displayed a much smaller growth defect (Fig  
277 8C&D). In addition, M2, which constitutively over expresses the *pyr* operon, is also less  
278 sensitive to 5-FOA than wild type (Fig 8C&D). Thus, the mutations we introduced into the *pyrR*  
279 RNA element affect the secondary structure in the manner that we intended, and can have far  
280 reaching regulatory and fitness effects. Importantly, it shows that a drug targeted against the  
281 secondary structure can directly manipulate and severely hamper growth.

282

283 A remaining key question is the importance of RNA regulatory elements in colonization and the  
284 induction of disease. Somewhat surprisingly our *in vitro* growth curves suggest that constitutive  
285 expression of the *pyr* operon (M1) and constitutive overexpression (M2) is not all that  
286 detrimental to growth, indicating that efficient regulation is not critical. To assess the effect of  
287 loss of regulation on bacterial fitness *in vivo*, the *pyrR* RNA element mutants were tested in 1x1  
288 competition assays (mutant vs. wild type) in a mouse infection model (Fig 9). While fitness for  
289 all three mutants is similar to the unmodified strain *in vitro* in the presence of uracil, M1 and M3  
290 are unable to colonize and survive in the mouse nasopharynx, or infect and survive in the lung  
291 and transition and survive in the blood (Fig 9A&C). M2 has less of a defect *in vivo*, but still has a  
292 significantly diminished ability to infect and survive in the lung (Fig 9B). These results indicate  
293 that efficient regulation of the *pyr* operon *in vivo* is critical for growth and survival of *S.*  
294 *pneumoniae* within the host. While we had previously shown that genes in the *pyr* operon are  
295 important *in vivo* [44], the regulatory findings in this project take our understanding a step  
296 further and, importantly, in combination with the findings that 5-FOA can efficiently interact  
297 with the RNA regulatory element, suggests that it is feasible to modulate *in vivo* fitness and  
298 thereby virulence by targeting such regulatory elements.

299

### 300 **Towards comprehensive transcriptional landscape reconstructions and highly targeted** 301 **regulatory RNA element inhibitors.**

302 With the advent of deep sequencing technologies, our understanding of prokaryotic  
303 transcriptional dynamics is rapidly advancing [47] and underlining that bacterial transcriptomes  
304 are not as simple as previously thought. Analysis of the *S. pneumoniae* TIGR4 transcriptome  
305 using three different sequencing techniques (RNA-Seq, term-seq, and 5'end-Seq) has led to a

306 comprehensive mapping of its transcriptional landscape. Besides identifying 1597 TSSs and  
307 1330 sense and 236 antisense TTSs, we uncovered a complex operon structure, which has also  
308 been found in *E. coli* [4]. Importantly, such complexity likely allows for environment-dependent  
309 modulation of gene expression producing variable transcripts in response to varying conditions,  
310 which we illustrated here through analyses of a 9-gene complex operon and the mal regulon (Fig  
311 4). Additionally, similar environment-dependent versatile operon behavior has been observed in  
312 *E. coli* [4] and to a lesser extent in *Mycoplasma pneumoniae* [48]. This means that our  
313 understanding is shifting dramatically and it is thus becoming clear that operons in bacteria  
314 should be seen as adaptable structures that can significantly increase the regulatory capacity of  
315 the transcriptome by responding to environmental changes in a highly specific manner.

316

317 Another central aspect of our approach is the identification of putative 5'-UTR structured  
318 regulatory elements. Riboswitches and other untranslated regulatory elements (binding sites for  
319 small regulatory RNAs) are important bacterial RNA elements that are thought to regulate up to  
320 2% of bacterial genes [7,8]. However, the discovery of new regulators is difficult when relying  
321 solely on computational methodology and sequence conservation [49]. Here we show that  
322 through term-seq [32] it is possible to identify such RNA elements on a genome-wide scale and  
323 by combining it with RNA-Seq performed in different conditions transcriptional phenotypes can  
324 be directly linked to the RNA element. This strategy thus makes it possible to screen for  
325 regulatory RNA elements in retrospect by making use of already existing or newly generated  
326 RNA-Seq data.

327

328 Importantly, besides the ability to re-construct an organism's intricate transcriptional landscape  
329 we show that there is also a direct application of our multi-sequencing approach, namely the  
330 ability to inhibit operons and/or pathways with specific chemicals or drugs that target the RNA  
331 regulatory element. We show that this is possible for the pyrR RNA element, a regulatory  
332 element that is important for pneumococcal growth and virulence, which means that this  
333 regulatory element could be a potential antimicrobial drug target. This idea is further  
334 strengthened by the fact that *S. pneumoniae* displays a growth defect in the presence of 5-FOA,  
335 which directly relates to misregulation of pyrR RNA confirming its drug-able potential.

336

337 We believe that the presented multi-omics sequencing strategy brings a global understanding of  
338 regulation in *S. pneumoniae* significantly closer, and because the approach is easily transferable  
339 to other species, it will enable species-wide comparisons for conservation of operon structure and  
340 regulatory elements. In addition, such detailed regulatory understanding creates new regulatory  
341 control tools for synthetic biology purposes. Moreover, the combination with for instance *in vivo*  
342 experiments shows that it is a realistic goal to design or select specific compounds that target  
343 ribo-regulators in order to mitigate virulence or antibiotic resistance.

344

## 345 **Methods:**

### 346 *Culture conditions and sample collection*

347 For RNAtag-Seq, term-seq and 5'end-Seq library preparation, *Streptococcus pneumoniae* TIGR4  
348 (T4) was cultured in rich media (SDMM) to mid-log phase ( $OD_{600} = 0.4$ ). Cultures were diluted  
349 to an  $OD_{600}$  of 0.05 in fresh media, grown for one doubling ( $T_0$ ). At 0 min ( $T_0$ ) and after 30 min  
350 of growth ( $T_{30}$ ) 10ml culture was harvested by means of centrifugation (4000 rpm, 7 min at 4°C)

351 followed by flash freezing in a dry-ice ethanol bath and storage at  $-80^{\circ}\text{C}$  until RNA extraction.  
352 Sample collection was performed in four biological replicates and total RNA was isolated using  
353 an RNeasy Mini kit (Qiagen). For qRT-PCR analyses, T4 was cultured in SDMM to mid-log  
354 phase ( $\text{OD}_{600} = 0.4$ ) and after centrifugation cultures were washed with 1X PBS and diluted to an  
355  $\text{OD}_{600}$  of 0.003 in appropriate media. Cultures were harvested at mid-log followed by RNA  
356 extraction as described above.

357  
358 *5'end-Seq library preparation*

359 5'end-Seq libraries were generated by dividing the total RNA into 5' polyphosphate treated  
360 (Processed) and untreated (Non-Processed) samples that were subsequently processed and  
361 sequenced according to protocols described in Wurtzel et al., 2012 and [50] with few  
362 modifications. See supplemental methods for a detailed protocol.

363  
364 *RNA-Seq library preparation*

365 RNA-Seq libraries were generated by using the RNAtag-Seq protocol [31,51]. Briefly, 400 ng  
366 RNA was fragmented in FastAP buffer, DNase-treated with Turbo DNase, 5'-dephosphorylated  
367 using FastAP. Barcoded RNA adapters were then ligated to the 3' terminus, samples from  
368 different conditions were pooled and ribosomal RNA was depleted using the Ribo-zero rRNA  
369 removal kit. Illumina cDNA sequencing libraries were generated by first-strand cDNA synthesis,  
370 3' linker ligation and PCR with 17 cycles. The final concentration and size distribution were  
371 determined with the Qubit dsDNA BR Assay kit and the dsDNA D1000 TapeStation kit,  
372 respectively.

373  
374 *term-seq library preparation*



375 term-seq libraries were generated as previously described [32] with few modifications. 2 µg total  
376 RNA was depleted of genomic DNA using Turbo DNase, 5' dephosphorylated, ligated to  
377 barcoded RNA adapters at the 3' terminus and fragmented in fragmentation buffer. Barcoded and  
378 fragmented RNA from different conditions were pooled and ribosomal RNA was depleted using  
379 Ribo-zero. cDNA libraries were generated by first strand cDNA synthesis and RNA template  
380 was degraded as mentioned in the 5'end-Seq library preparation. Second 3' linker was ligated  
381 and PCR amplified for 17 cycles. All four library preparations (RNAtag-Seq, term-seq, 5'end-  
382 Seq processed and 5'end-Seq unprocessed) were pooled according to the method of preparation  
383 and sequenced at high depth (8.5 million reads/sample) on an Illumina NextSeq500.

384

#### 385 *Read processing and mapping*

386 The sequencing reads from the 5' end-Seq sequencing, 3' end sequencing (term-seq), and  
387 RNAtag-Seq were processed and mapped to the *S. pneumoniae* TIGR4 (NC\_003028.3) genome  
388 using the in-house developed Aerobio pipeline. Aerobio runs the processing and mapping in two  
389 phases. Phase 0 employs bcl2fastq to convert BCL to fastq files, quality control and de-  
390 multiplexing and compilation of the reads based on the sample conditions. Phase 1 maps the de-  
391 multiplexed reads against the genome, under default parameters, using Bowtie2 [52] and streams  
392 the output to SAMtools [53] to generate sorted and indexed BAM files for each sample.

393

#### 394 *in silico prediction of transcription start sites (TSSs) and transcription termination sites (TTSs)*

395 Perl code from [32] was adapted to estimate the number of reads mapped at each nucleotide from  
396 the 5' end, 3' end, and RNA sequencing runs. With the nucleotide level coverage data calculated  
397 from the 5' end-Seq, regions up to 500 nucleotides upstream of the translational start sites  
398 described in the annotated TIGR4 genome (NC\_003028.3) were scanned for mapped reads with

399 a minimum coverage of 2 and a Processed/non-Processed ratio of 1 as in [32]. When multiple  
400 putative TSSs were identified in a 5' UTR, the one with the highest Processed/non-Processed  
401 ratio was assigned as the TSS for the downstream gene. Similar to the identification of the TSSs,  
402 TTSs were identified by scanning up to 150 nucleotides downstream of the translational stop site  
403 for mapped 3' end reads with a minimum coverage of 2 in at least 4 replicates, out of the 12 total  
404 datasets. The position with the highest coverage was considered the most likely TTS for a gene.

405

#### 406 *Identification of transcript boundaries and operon structures in the genome*

407 BAM files of the mapped RNAtag-Seq reads were analyzed using Rockhopper [33] to predict  
408 transcript boundaries and group genes into operons. Predicted operons were compared with the  
409 genome based predictions listed in the Database of Prokaryotic Operons [5,34,54], and  
410 complexity in the operon structure was characterized by surveying the number of internal TSSs  
411 and TTSs similar to [4].

412

#### 413 *Identification of candidate regulatory elements*

414 Once the TSSs were identified, 5'-UTR regions with a length of at least 70 nucleotides were  
415 scanned for mapped 3' end sequencing reads with a minimum coverage of 2 to identify putative  
416 early terminators. 5'-UTR regions with a predicted early TTS were binned as candidate  
417 regulatory elements. The nucleotide sequence for each candidate element was obtained and  
418 folded using RNAFold [55]. Secondary structures and free energy values were compiled for each  
419 candidate. Putative candidates were compared to known bacterial non-coding RNAs described in  
420 Rfam [56,57] that were identified in the genome by the cmsearch function of Infernal 1.1 [37].

421

422 The response of candidate regulatory elements to different media conditions were assessed by  
423 calculating the RNA-Seq coverage in both the regulatory element and the regulated gene. Read-  
424 through was calculated for each of the candidates as described previously [32]. Briefly, read-  
425 through is the ratio (denoted in percentage) of the average coverage across the gene to that of the  
426 5'-UTR identified here. The greater the read-through, the higher the expression of the gene with  
427 respect to the 5'-UTR. That is, if the regulator reduced the expression of the gene, read-through  
428 would be small. If the regulator turned on gene expression in response to certain conditions, the  
429 read-through would be large.

430

#### 431 *Conservation of the candidate regulatory elements in Streptococcus pneumoniae*

432 A local BLAST [58] database was generated with the genomes of 30 *S. pneumoniae* strains  
433 available in Refseq 77 [59] and 350 strains from [35]. Each of the candidate regulators identified  
434 in the genome of TIGR4 was BLASTed against this database, and hits in the other genomes were  
435 extracted and aligned using MAFFT version 7 [60]. The degree of conservation across the 380  
436 genomes was determined by surveying each candidate cluster post filtering to remove sequences  
437 that were less than 70% in length of the query and with e-values greater than  $1 \times 10^{-4}$ . The  
438 candidates were also screened for overlap with previously published small RNAs identified in *S.*  
439 *pneumoniae* [13,15].

440

#### 441 *Expression analysis using qPCR*

442 RNA was isolated from cultures using the Qiagen RNeasy kit (Qiagen). DNase treated RNA was  
443 used to generate cDNA with iScript reverse transcriptase supermix for RT-qPCR (BioRad).  
444 Quantitative PCR was performed using a Bio-Rad MyiQ. Each sample was normalized against

445 the 50S ribosomal gene, SP2204 and were measured in biological replicate and technical  
446 triplicates. No-reverse transcriptase and no-template controls were included for all samples.

447

#### 448 *pyrR* RNA mutant growth assays

449 Wild type and *pyrR* RNA mutants of T4 were grown for 2 hours and diluted to an OD<sub>600</sub> of 0.015  
450 in fresh media, with varying concentrations of uracil and/or 5-FOA. Growth assays were  
451 performed in 96-well plates for 16 hours by taking OD<sub>600</sub> measurements every half hour using a  
452 Tecan Infiniti Pro plate reader (Tecan). Growth assays were performed no less than two times.

453

#### 454 *In vivo pyrR* mutant fitness determination

455 1 x 1 competition experiments were performed with *pyrR* RNA mutants (M1 to M3) that were  
456 competed against the wild-type strain after which bacterial fitness was calculated as previously  
457 described [44] with a few modifications. Lung removal and homogenization (in 10 mL 1 x PBS),  
458 blood collection (100 uL) and nasopharynx lavage (with 1 ml 1X PBS) were performed on all  
459 animals 24 hours post infection, with the exception of *pyrR* M3, which due to the large fitness  
460 defect were harvested at 6 hours post infection.

461

462 **Acknowledgements:** We would like to thank Jon Anthony for sequence data processing on the  
463 Aerobio platform, Charles S. Hoffman for generous gift of 5-FOA that we used in this study and  
464 Daniel Dar for discussion and helpful suggestions. The sequencing datasets generated during the  
465 current study are available in the Sequence Read Archive (SRP136114). This work is supported  
466 by NIH grant R01GM115931 to MMM and TvO, and R01AI110724 and U01AI124302 to TvO.

467

468 **Author contributions.** MMM and TvO devised the study. MMM, TvO, IW and ZZ designed the  
469 experiments, IW and ZZ generated the sequencing data, IW and AH performed *in vitro*  
470 experiments and AH performed *in vivo* experiments. IW, ZZ and NR performed RNA-Seq data  
471 analysis, NR performed term-seq and 5' end-Seq data analyses and IW, NR, MMM and TvO  
472 wrote the manuscript.

473

474

## 475 **References**

476

- 477 1. Jacob F, Manod J. Genetic regulatory mechanisms in the synthesis of proteins. *J Mol*  
478 *Biol.* 1961;3: 318–356. doi:10.1016/S0022-2836(61)80072-7
- 479 2. Homuth G, Mogk A, Schumann W. Post-transcriptional regulation of the *Bacillus subtilis*  
480 *dnaK* operon. *Molecular Microbiology.* 1999;32: 1183–1197.
- 481 3. de Saizieu A, Certa U, Warrington J, Gray C, Keck W, Mous J. Bacterial transcript  
482 imaging by hybridization of total RNA to oligonucleotide arrays. *Nat Biotech.* 1998;16: 45–  
483 48. doi:10.1038/nbt0198-45
- 484 4. Conway T, Creecy JP, Maddox SM, Grissom JE, Conkle TL, Shadid TM, et al.  
485 Unprecedented high-resolution view of bacterial operon architecture revealed by RNA  
486 sequencing. *mBio.* 2014;5: e01442–14. doi:10.1128/mBio.01442-14
- 487 5. Mao X, Ma Q, Liu B, Chen X, Zhang H, Xu Y. Revisiting operons: an analysis of the  
488 landscape of transcriptional units in *E. coli*. *BMC Bioinformatics.* 6 ed. 2015;16: 356.  
489 doi:10.1186/s12859-015-0805-8
- 490 6. Sharma CM, Hoffmann S, Darfeuille F, Reignier J, Findeiß S, Sittka A, et al. The primary  
491 transcriptome of the major human pathogen *Helicobacter pylori*. *Nature.* 2010;464: 250–  
492 255. doi:10.1038/nature08756
- 493 7. Mandal M, Boese B, Barrick J, Winkler W, Breaker R. Riboswitches control fundamental  
494 biochemical pathways in *Bacillus subtilis* and other bacteria. *Cell.* 2003;113: 577–586.
- 495 8. Waters LS, Storz G. Regulatory RNAs in Bacteria. *Cell.* 2009;136: 615–628.  
496 doi:10.1016/j.cell.2009.01.043
- 497 9. Saberi F, Kamali M, Najafi A, Yazdanparast A, Moghaddam MM. Natural antisense RNAs

- 498 as mRNA regulatory elements in bacteria: a review on function and applications. *Cell Mol*  
499 *Biol Lett. BioMed Central*; 2016;21: 6. doi:10.1186/s11658-016-0007-z
- 500 10. Ignatov D, Johansson J. RNA-mediated signal perception in pathogenic bacteria. *WIREs*  
501 *RNA*. 2017;8. doi:10.1002/wrna.1429
- 502 11. Eyraud A, Tattevin P, Chabelskaya S, Felden B. A small RNA controls a protein regulator  
503 involved in antibiotic resistance in *Staphylococcus aureus*. *Nucleic Acids Res*. 2014;42:  
504 4892–4905. doi:10.1093/nar/gku149
- 505 12. Vanderpool CK, Balasubramanian D, Lloyd CR. Dual-function RNA regulators in bacteria.  
506 *Biochimie*. 2011;93: 1943–1949. doi:10.1016/j.biochi.2011.07.016
- 507 13. Acebo P, Martin-Galiano AJ, Navarro S, Zaballos A, Amblar M. Identification of 88  
508 regulatory small RNAs in the TIGR4 strain of the human pathogen *Streptococcus*  
509 *pneumoniae*. *RNA*. 2012;18: 530–546. doi:10.1261/rna.027359.111
- 510 14. Deltcheva E, Chylinski K, Sharma CM, Gonzales K, Chao Y, Pirzada ZA, et al. CRISPR  
511 RNA maturation by trans-encoded small RNA and host factor RNase III. *Nature*.  
512 2011;471: 602–607. doi:10.1038/nature09886
- 513 15. Mann B, van Opijnen T, Wang J, Obert C, Wang Y-D, Carter R, et al. Control of Virulence  
514 by Small RNAs in *Streptococcus pneumoniae*. Cossart P, editor. *PLoS Pathog*. 2012;8:  
515 e1002788. doi:10.1371/journal.ppat.1002788.s001
- 516 16. Pichon C, Merle du L, Caliot M-E, Trieu-Cuot P, Le Bouguenec C. An in silico model for  
517 identification of small RNAs in whole bacterial genomes: characterization of antisense  
518 RNAs in pathogenic *Escherichia coli* and *Streptococcus agalactiae* strains. *Nucleic Acids*  
519 *Res*. 2012;40: 2846–2861. doi:10.1093/nar/gkr1141
- 520 17. Rosinski-Chupin I, Sauvage E, Sismeiro O, Villain A, Da Cunha V, Caliot M-E, et al.  
521 Single nucleotide resolution RNA-seq uncovers new regulatory mechanisms in the  
522 opportunistic pathogen *Streptococcus agalactiae*. *BMC Genomics*. 2015;16: 2906–15.  
523 doi:10.1186/s12864-015-1583-4
- 524 18. Tesorero RA, Yu N, Wright JO, Svencionis JP, Cheng Q, Kim J-H, et al. Novel regulatory  
525 small RNAs in *Streptococcus pyogenes*. *PLoS ONE*. 2013;8: e64021.  
526 doi:10.1371/journal.pone.0064021
- 527 19. Wurtzel O, Sesto N, Mellin JR, Karunker I, Edelheit S, Bécavin C, et al. Comparative  
528 transcriptomics of pathogenic and non-pathogenic *Listeria* species. *Molecular Systems*  
529 *Biology*. 2012;8: 583. doi:10.1038/msb.2012.11
- 530 20. Papenfort K, Vogel J. Regulatory RNA in Bacterial Pathogens. *Cell Host Microbe*.  
531 Elsevier Inc; 2010;8: 116–127. doi:10.1016/j.chom.2010.06.008

- 532 21. Caldelari I, Chao Y, Romby P, Vogel J. RNA-Mediated Regulation in Pathogenic  
533 Bacteria. *Cold Spring Harbor Perspectives in Medicine*. 2013;3: a010298–a010298.  
534 doi:10.1101/cshperspect.a010298
- 535 22. Blount KF, Wang JX, Lim J, Sudarsan N, Breaker RR. Antibacterial lysine analogs that  
536 target lysine riboswitches. *Nat Chem Biol*. 2006;3: 44–49. doi:10.1038/nchembio842
- 537 23. Lunse CE, Schuller A, Mayer G. The promise of riboswitches as potential antibacterial  
538 drug targets. *Int J Med Microbiol*. 2014;304: 79–92. doi:10.1016/j.ijmm.2013.09.002
- 539 24. Mulhbachter J, St-Pierre P, Lafontaine DA. Therapeutic applications of ribozymes and  
540 riboswitches. *Curr Opin Pharmacol*. Elsevier Ltd; 2010;10: 551–556.  
541 doi:10.1016/j.coph.2010.07.002
- 542 25. Howe JA, Wang H, Fischmann TO, Balibar CJ, Xiao L, Galgoci AM, et al. Selective small-  
543 molecule inhibition of an RNA structural element. *Nature*. 2015;526: 672–677.  
544 doi:10.1038/nature15542
- 545 26. CDC. Antibiotic Resistance Threats in the United States, 2013. CDC report. 2013;; 1–  
546 114.
- 547 27. Henriques-Normark B, Tuomanen EI. The pneumococcus: epidemiology, microbiology,  
548 and pathogenesis. *Cold Spring Harbor Perspectives in Medicine*. 2013;3.  
549 doi:10.1101/cshperspect.a010215
- 550 28. WHO. The World Health Report 2007. World Health Organization; 2007. pp. 1–96.
- 551 29. Wu Z, Wu C, Shao J, Zhu Z, Wang W, Zhang W, et al. The *Streptococcus suis*  
552 transcriptional landscape reveals adaptation mechanisms in pig blood and cerebrospinal  
553 fluid. *RNA*. 2014;20: 882–898. doi:10.1261/rna.041822.113
- 554 30. Kumar R, Shah P, Swiatlo E, Burgess SC, Lawrence ML, Nanduri B. Identification of  
555 novel non-coding small RNAs from *Streptococcus pneumoniae* TIGR4 using high-  
556 resolution genome tiling arrays. *BMC Genomics*. 2010;11: 350. doi:10.1186/1471-2164-  
557 11-350
- 558 31. Shishkin AA, Giannoukos G, Kucukural A, Ciulla D, Busby M, Surka C, et al.  
559 Simultaneous generation of many RNA-seq libraries in a single reaction. *Nat Meth*.  
560 2015;12: 323–325. doi:10.1038/nmeth.3313
- 561 32. Dar D, Shamir M, Mellin JR, Koutero M, Stern-Ginossar N, Cossart P, et al. Term-seq  
562 reveals abundant ribo-regulation of antibiotics resistance in bacteria. *Science*. 2016;352:  
563 187–187. doi:10.1126/science.aad9822
- 564 33. Tjaden B. *De novo* assembly of bacterial transcriptomes from RNA-seq data. *Genome*  
565 *Biol*. 2015;16: 1. doi:10.1186/s13059-014-0572-2

- 566 34. Mao F, Dam P, Chou J, Olman V, Xu Y. DOOR: a database for prokaryotic operons.  
567 Nucleic Acids Res. 2009;37: D459.
- 568 35. Cremers AJH, Mobegi FM, de Jonge MI, van Hijum SAFT, Meis JF, Hermans PWM, et al.  
569 The post-vaccine microevolution of invasive *Streptococcus pneumoniae*. Sci Rep. Nature  
570 Publishing Group; 2015;5: 14952. doi:10.1038/srep14952
- 571 36. Kumar S, Stecher G, Tamura K. MEGA7: Molecular Evolutionary Genetics Analysis  
572 Version 7.0 for Bigger Datasets. Molecular Biology and Evolution. 2016;33: 1870–1874.  
573 doi:10.1093/molbev/msw054
- 574 37. Nawrocki EP, Eddy SR. Infernal 1.1: 100-fold faster RNA homology searches.  
575 Bioinformatics. 2013;29: 2933–2935. doi:10.1093/bioinformatics/btt509
- 576 38. Winkler W, Nahvi A, Breaker R. Thiamine derivatives bind messenger RNAs directly to  
577 regulate bacterial gene expression. Nature. 2002;419: 952–956.
- 578 39. Winkler W, Cohen-Chalamish S, Breaker R. An mRNA structure that controls gene  
579 expression by binding FMN. Proc Natl Acad Sci USA. 2002;99: 15908.
- 580 40. Switzer RL, Turner RJ, Lu Y. Regulation of the *Bacillus subtilis* pyrimidine biosynthetic  
581 operon by transcriptional attenuation: control of gene expression by an mRNA-binding  
582 protein. Prog Nucleic Acid Res Mol Biol. 1999;62: 329–367.
- 583 41. Turner RJ, Lu Y, Switzer RL. Regulation of the *Bacillus subtilis* pyrimidine biosynthetic  
584 (*pyr*) gene cluster by an autogenous transcriptional attenuation mechanism. J Bacteriol.  
585 1994;176: 3708–3722.
- 586 42. Tomchick DR, Turner RJ, Switzer RL, Smith JL. Adaptation of an enzyme to regulatory  
587 function: structure of *Bacillus subtilis* PyrR, a *pyr* RNA-binding attenuation protein and  
588 uracil phosphoribosyltransferase. Structure. 1998;6: 337–350.
- 589 43. Lu Y, Turner RJ, Switzer RL. Function of RNA secondary structures in transcriptional  
590 attenuation of the *Bacillus subtilis pyr* operon. Proc Natl Acad Sci USA. 1996;93: 14462–  
591 14467.
- 592 44. van Opijnen T, Camilli A. A fine scale phenotype-genotype virulence map of a bacterial  
593 pathogen. Genome Research. 2012;22: 2541–2551. doi:10.1101/gr.137430.112
- 594 45. Longley DB, Harkin DP, Johnston PG. 5-fluorouracil: mechanisms of action and clinical  
595 strategies. Nature Reviews Cancer. 2003;3: 330–338. doi:10.1038/nrc1074
- 596 46. Ghode P, Ramachandran S, Bifani P, Sivaraman J. Structure and mapping of  
597 spontaneous mutational sites of PyrR from *Mycobacterium tuberculosis*. Biochemical and  
598 biophysical research communications. 2016;471: 409–415.  
599 doi:10.1016/j.bbrc.2016.02.071



- 600 47. James K, Cockell SJ, Zenkin N. Deep sequencing approaches for the analysis of  
601 prokaryotic transcriptional boundaries and dynamics. *Methods*. 2017;120: 76–84.  
602 doi:10.1016/j.ymeth.2017.04.016
- 603 48. Güell M, Van Noort V, Yus E, Chen W, Leigh-Bell J, Michalodimitrakis K, et al.  
604 Transcriptome complexity in a genome-reduced bacterium. *Science*. 2009;326: 1268.
- 605 49. Breaker RR. Prospects for Riboswitch Discovery and Analysis. *Molecular Cell*. Elsevier  
606 Inc; 2011;43: 867–879. doi:10.1016/j.molcel.2011.08.024
- 607 50. Shell SS, Chase MR, Ioerger TR, Fortune SM. RNA sequencing for transcript 5'-end  
608 mapping in mycobacteria. *Methods Mol Biol*. 2015;1285: 31–45. doi:10.1007/978-1-4939-  
609 2450-9\_3
- 610 51. Jensen PA, Zhu Z, van Opijnen T. Antibiotics Disrupt Coordination between  
611 Transcriptional and Phenotypic Stress Responses in Pathogenic Bacteria. *CellReports*.  
612 2017;20: 1705–1716. doi:10.1016/j.celrep.2017.07.062
- 613 52. Langmead B, Trapnell C, Pop M, Salzberg SL. Ultrafast and memory-efficient alignment  
614 of short DNA sequences to the human genome. *Genome Biol*. 2009;10: R25.  
615 doi:10.1186/gb-2009-10-3-r25
- 616 53. Li H, Handsaker B, Wysoker A, Fennell T, Ruan J, Homer N, et al. The Sequence  
617 Alignment/Map format and SAMtools. *Bioinformatics*. 2009;25: 2078–2079.  
618 doi:10.1093/bioinformatics/btp352
- 619 54. Dam P, Olman V, Harris K, Su Z, Xu Y. Operon prediction using both genome-specific  
620 and general genomic information. *Nucleic Acids Res*. 2006;35: 288–298.  
621 doi:10.1093/nar/gkl1018
- 622 55. Lorenz R, Bernhart SH, Höner Zu Siederdisen C, Tafer H, Flamm C, Stadler PF, et al.  
623 ViennaRNA Package 2.0. *Algorithms Mol Biol*. 2011;6: 26. doi:10.1186/1748-7188-6-26
- 624 56. Griffiths-Jones S, Bateman A, Marshall M, Khanna A, Eddy SR. Rfam: an RNA family  
625 database. *Nucleic Acids Res*. 2003;31: 439–441. doi:10.1093/nar/gkg006
- 626 57. Nawrocki EP, Burge SW, Bateman A, Daub J, Eberhardt RY, Eddy SR, et al. Rfam 12.0:  
627 updates to the RNA families database. *Nucleic Acids Res*. 2015;43: D130–7.  
628 doi:10.1093/nar/gku1063
- 629 58. Altschul S, Gish W, Miller W, Myers E, Lipman D. Basic local alignment search tool. *J Mol*  
630 *Biol*. 1990;215: 403–410.
- 631 59. O'Leary NA, Wright MW, Brister JR, Ciuffo S, Haddad D, McVeigh R, et al. Reference  
632 sequence (RefSeq) database at NCBI: current status, taxonomic expansion, and  
633 functional annotation. *Nucleic Acids Res*. 2016;44: D733–45. doi:10.1093/nar/gkv1189

634 60. Katoh K, Standley DM. MAFFT multiple sequence alignment software version 7:  
635 improvements in performance and usability. *Molecular Biology and Evolution*. 2013;30:  
636 772–780. doi:10.1093/molbev/mst010

637

638

639

640 **Figure legends**

641

642 **Figure 1. Schematic representation of the sequencing and data analysis methodology. (A)** A  
643 description of the experimental pipeline. RNA-Seq (left column) and term-seq (middle column)  
644 libraries were prepared according to protocols described in [31,32]. 5'end-Seq libraries (right  
645 column) were generated by dividing the total RNA into 5' polyphosphate treated (Processed) and  
646 untreated (Non-Processed) samples and subsequently processed according to protocols described  
647 in [19,50]. White and grey lines correspond to RNA and cDNA, respectively and colored blocks  
648 represent unique sequence barcodes. Illumina sequencing adaptors with index barcodes are also  
649 indicated. **(B)** A brief description of the analysis pipeline. Raw reads from all three sequencing  
650 methodologies describes above were de-multiplexed and aligned to T4 (NC\_003028.3). Based  
651 on the reads mapped, single nucleotide coverage was calculated. Coverage calculated for the 5'  
652 end-Seq was used to determine the transcription start sites. Coverage from term-seq was used to  
653 determine the transcription termination sites. RNA-Seq coverage was used to calculate the read-  
654 through across candidate 5' untranslated regions with early transcription terminators.

655

656 **Figure 2. Genome-wide map of the *Streptococcus pneumoniae* TIGR4 transcriptional**  
657 **landscape.** A map of all the transcriptional features identified. The internal band represents the  
658 1597 transcription start sites (TSSs) in green; 565 putative candidate regulatory regions in black;  
659 565 early transcription termination sites in the 5'-UTR in orange; 1330 sense transcription  
660 termination sites (TTS) in red; and 236 antisense transcription termination sites in blue. The  
661 outer band of the genome map represents the annotated operon structures that were classified  
662 according to their number of TSS and TTSs: 1) traditional operons consisting of multiple genes  
663 with a single TSS and a TTS (green); 2) multiTSS operons consisting of multiple genes with  
664 internal TSSs but one TTS (blue); 3) multiTTS operons consisting of multiple genes with a  
665 single TSS but multiple internal TTSs (red); and 4) complex operons consisting of multiple  
666 genes with multiple internal TSSs and TTSs (orange). To avoid clutter, simple operons  
667 consisting of a single gene with a single TTS and TSS are not shown.

668

669 **Figure 3. Distribution of operon types in the genome and frequency of transcriptional**  
670 **features within non-traditional operons. (A)** The pie chart describes the distribution of the

671 types of operons present in T4. A total of 474 multigene and 773 single gene operons were  
672 identified, which can be divided up in 62% simple operons (single gene transcriptional units with  
673 a single TSS and TTS; gray), 26% complex operons (multi-gene operons with multiple TSSs and  
674 TTSs; orange), 5% traditional operons (multi-gene operon with a single TSS and TTS; green),  
675 4% multiTSS operons (blue), and 3% multiTTS operons (red). **(B)** The histogram describes the  
676 distribution of genes and transcriptional features in non-traditional operons, where gray  
677 represents the numbers of genes in the multigene operons, green represents the number of TSSs  
678 within operons, red represents the number of TTSs within operons, and overlapping numbers are  
679 shown in brown. Two-gene operons are found most frequently in the non-traditional operons  
680 with one internal TSS and TTS.

681  
682 **Figure 4. Variability in expression levels between genes in the same operon when grown in**  
683 **rich (SDMM) and poor (MCDM) media conditions.** RNA-Seq coverage maps of complex  
684 operon/regulon including the TSSs in green and TTSs in red. Size of the transcriptional features  
685 represents log transformation of the Processed/Non-Processed ratio for TSSs and coverage for  
686 TTSs. **(A)** A complex 9-gene operon (SP1018–SP1026) encoding thymidine kinase, GNAT  
687 family N-acetyltransferase, peptide chain release factor 1, peptide chain release factor N(5)-  
688 glutamine methyltransferase, threonylcarbonyl-AMP synthase, N-acetyltransferase, serine  
689 hydroxymethyltransferase, nucleoid-associated protein, and Pneumococcal vaccine antigen A  
690 respectively. Genes SP1022-SP1026 are expressed to greater levels in MCDM than in SDMM  
691 unlike genes SP1018-SP1021. **(B)** The maltose regulon, an example of three operons of different  
692 complexities working together in response to maltose in the medium. Complex operon SP2108-  
693 SP2110 shows greater expression in MCDM than SDMM in comparison to the simple operon  
694 SP2111-SP2112 and multiTTS operon SP2106-SP2017

695  
696 **Figure 5. Validation of the regulatory activities of FMN and TPP riboswitches in different**  
697 **nutrient conditions.** The relative expression and average RNA-Seq coverage of SP0178 **(A)** and  
698 SP0716 **(C)** increases in poor (MCDM) medium compared to rich (SDMM) medium, potentially  
699 compensating for the depletion of the specific ligand. Expression of SP0178 **(B)** and SP0716 **(D)**  
700 is reduced when the poor medium is supplemented with respective ligands thus confirming the  
701 regulatory activities of FMN and TPP riboswitches. (FMN- Riboflavin; TPP- Thiamine).

702

703 **Figure 6. Mechanism and regulatory activity of pyrR regulatory RNA element in the**  
704 **presence and absence of uracil.** (A) Schematic representation of the proposed mechanism of  
705 regulation of *pyr* operon by pyrR RNA element. In the presence of UMP, PyrR binds to the pyrR  
706 RNA and results in the formation of a premature terminator, disrupting the anti-terminator  
707 formed when UMP is low, resulting in transcription termination. (B) RNA-Seq coverage map  
708 across the *pyr* operon (SP1278-1276) showing premature transcription termination and  
709 consequently decreased expression of its genes downstream of the pyrR regulator when grown in  
710 defined medium (CDM) in the presence of uracil (yellow) compared to the absence of uracil  
711 (blue). TSSs are in green and the size represents the log transformation of the Processed/Non-  
712 Processed ratio and TTSs are in red and size represents the log transformation of the coverage.  
713 (C) qRT-PCR determining the expression of the first genes in the *pyr* operon (SP1278) in the  
714 presence and absence of uracil validates the RNA-Seq observation.

715

716 **Figure 7. Structure and regulatory activity of pyrR RNA mutants.** (A) Secondary structure  
717 of the *S. pneumoniae* pyrR RNA regulatory element in ‘off’ conformation. Boxed in red and  
718 yellow are bases that were deleted in M1 and M3 mutations, respectively. Bases boxed in green  
719 were replaced by indicated bases to make mutation M2. Highlighted in grey are nucleotides that  
720 would base pair to form the anti-terminator when the riboswitch is in the “on” conformation. (B)  
721 A representative qRT-PCR quantification of the expression of SP1278 transcript from pyrR RNA  
722 mutant strains cultured in defined medium with or without uracil, corresponding to the regulatory  
723 activity of pyrR RNA mutants. While the WTc (wild type with chloramphenicol resistance  
724 cassette) decreases expression in the presence of uracil, M1 is insensitive to the ligand. M2 and  
725 M3 result in either constitutive or reduced expression of the *pyr* operon. ~2 fold higher  
726 expression in M1 compared to WTc in the absence of uracil could be the result of endogenous  
727 uracil having a slight inhibiting effect on the wild type.

728

729 **Figure 8. Regulation by pyrR regulatory element is important, but not essential for *in vitro***  
730 **growth of *S. pneumoniae*.** (A-B) Representative *in vitro* growth curves of mutants when  
731 cultured in defined media with (20 µg/ml) or without uracil. While mutant M2 (green) does not  
732 display a growth defect, mutants M1 (orange) and M3 (maroon) have growth defects that are

733 restored in the presence of uracil indicating that a functional pyrR RNA element is important, but  
734 not absolutely essential for *in vitro* growth of *S. pneumoniae*. WT (blue) doesn't have any  
735 growth defect in the tested conditions. **(C-D)** Representative *in vitro* growth curves of mutants  
736 cultured in media with (15 µg/ml) or without 5-FOA, a toxic uracil analog. All strains show  
737 varying degrees of defects in the tested conditions indicating that a drug targeted against the  
738 secondary structure can severely and specifically hamper growth. Mutant M3 was not included in  
739 this assay as it had a severe growth defect in the assay condition.

740

741 **Figure 9. Regulation by the pyrR RNA element is crucial for *in vivo* survival and virulence**  
742 **of *S. pneumoniae*.** 1x1 competition assays (mutant vs wild type T4) reveals fitness defects of  
743 pyrR RNA mutants in a mouse infection model. While M1 (A) and M3 (C) display severe  
744 defects in all the tested *in vivo* environments namely lung, blood and nasopharynx, M2 (B) has  
745 less of a defect. Significant change in fitness ( $p < 0.0125$ ) are indicated by asterisks (\*). Each data  
746 point represents a single mouse.

747

748 **Supplemental figure 1. Distribution and conservation of the 565 putative regulatory**  
749 **candidates across 380 *S. pneumoniae* genomes.** **A.** Frequency distribution of the candidates  
750 across the surveyed genomes. **B.** Conservation of the candidates as a measure of the mean p-  
751 Distance within each candidate cluster.

752

753 **Supplemental figure 2. Validation of the regulatory activities of three putative 5'-UTR**  
754 **regulatory candidates in different nutrient conditions.** The relative expression and average  
755 RNA-Seq coverage of SP1356 (A), SP0240 (B) and SP1951 (C) increases in poor media  
756 (MCDM) compared to rich media (SDMM), potentially compensating for the depletion of the  
757 specific ligand.

758

759

760

761

A

## Schematic Representation of the Protocol

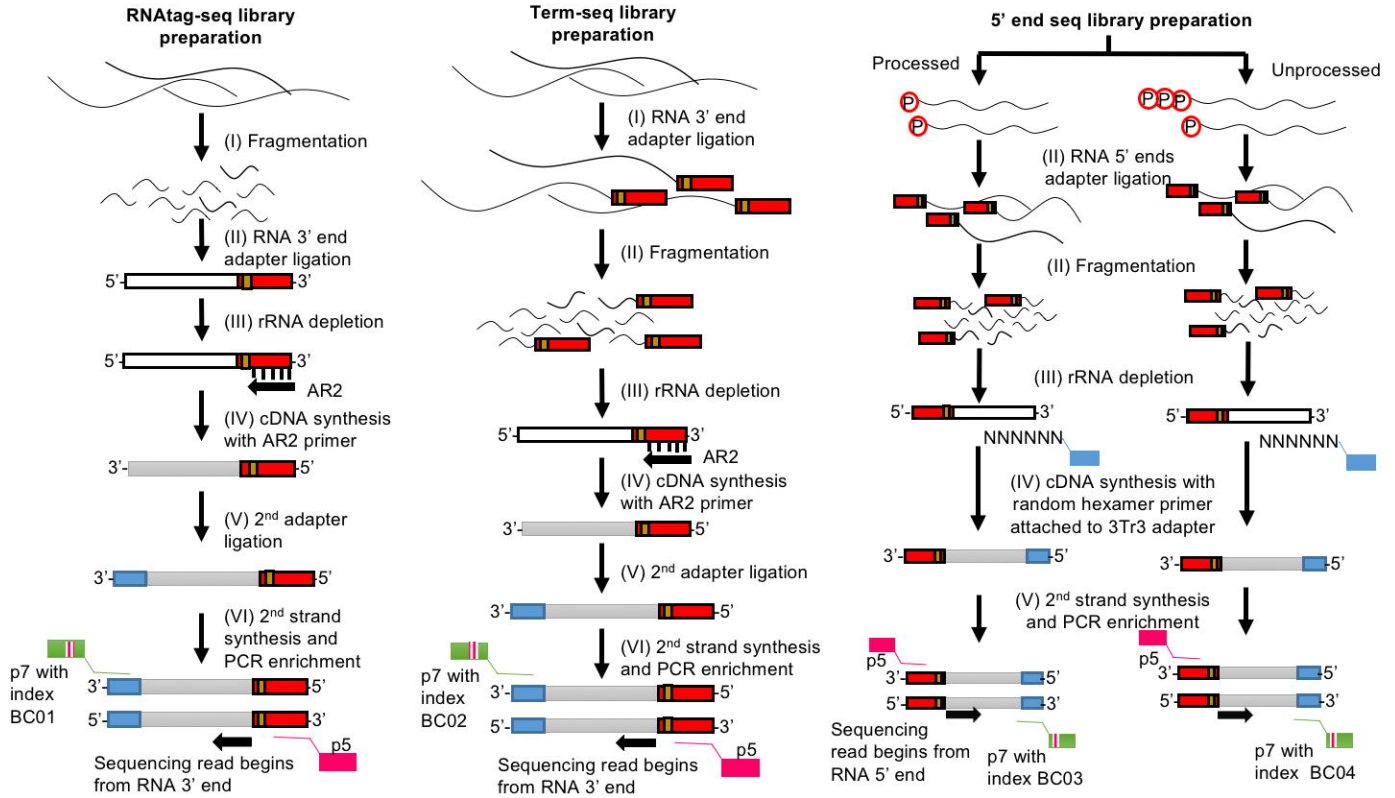

B

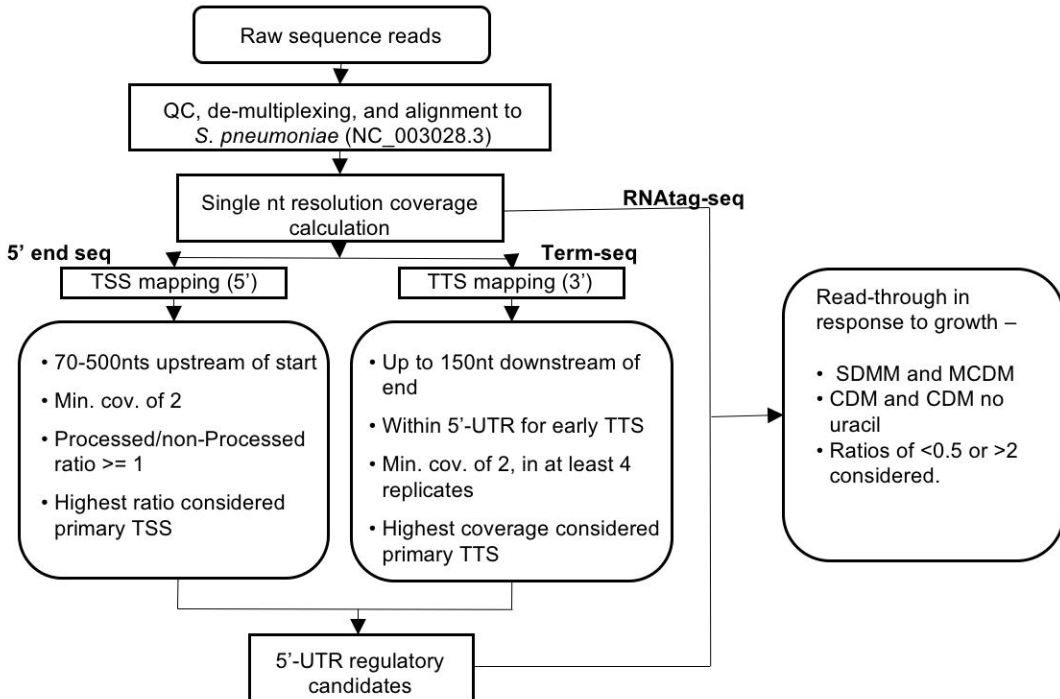

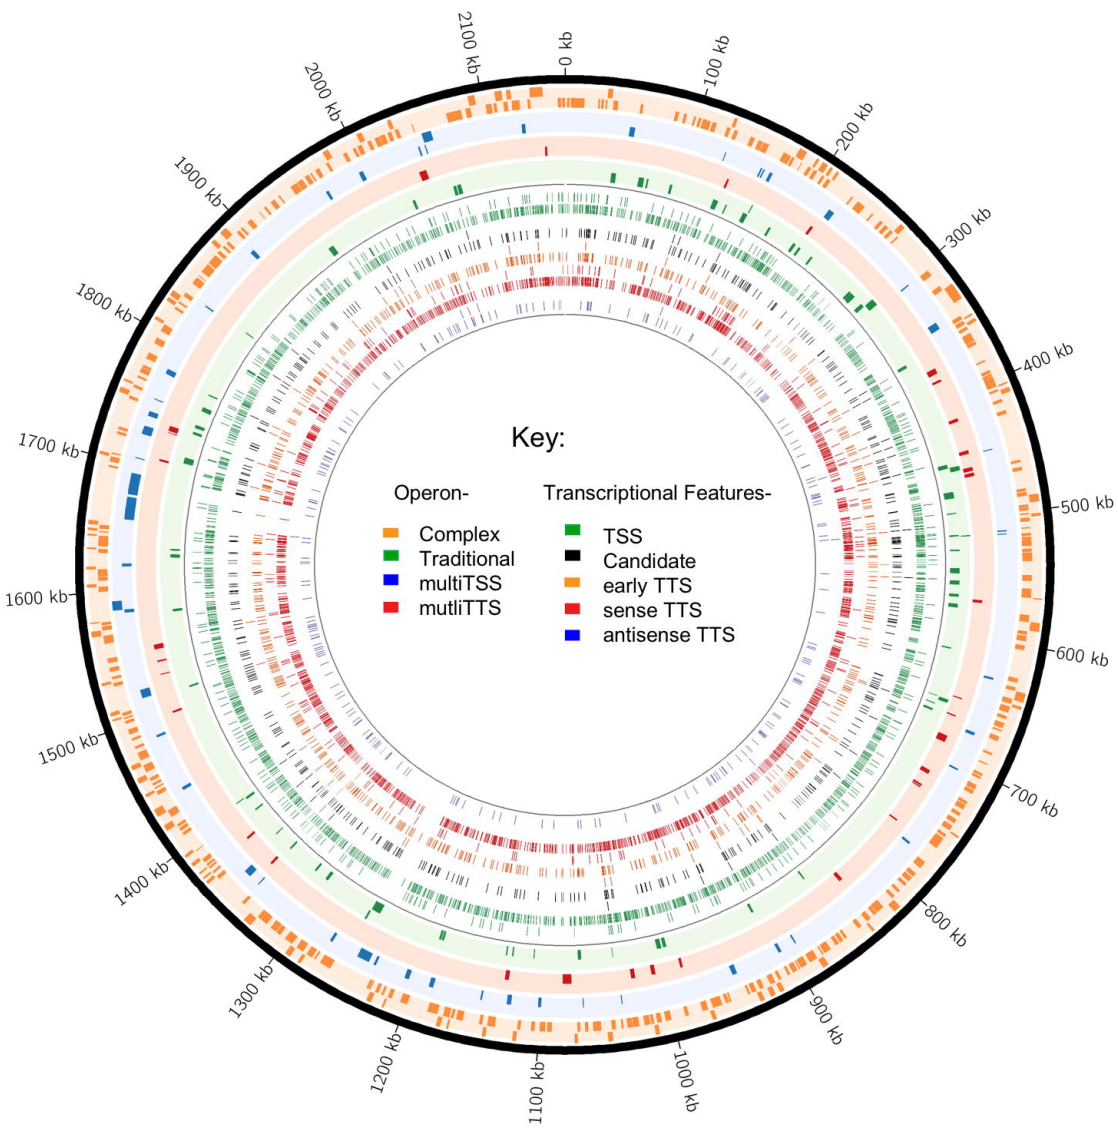



**A**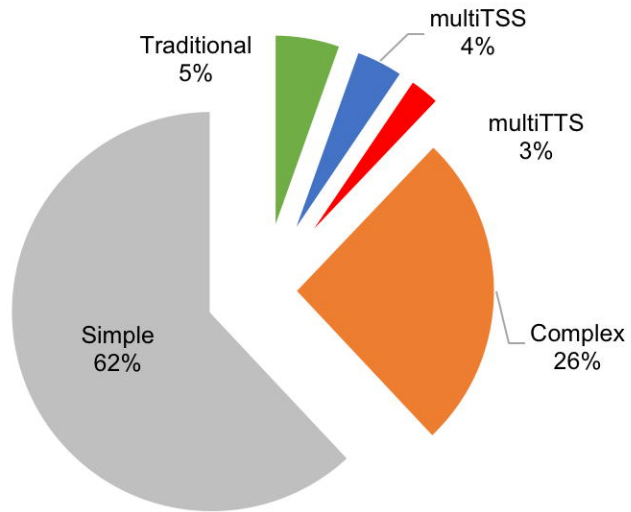**B**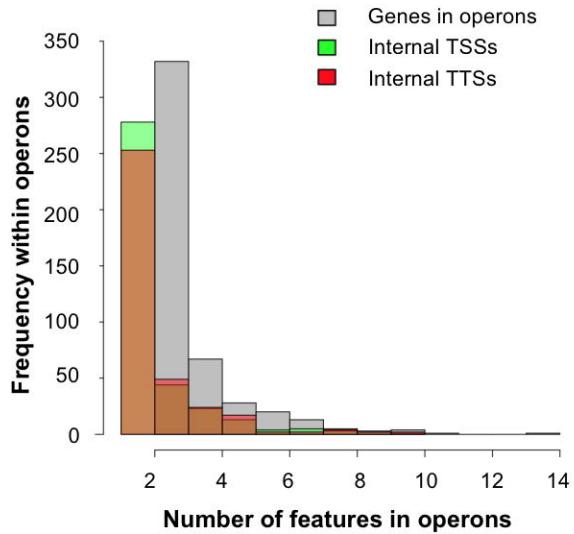

**A**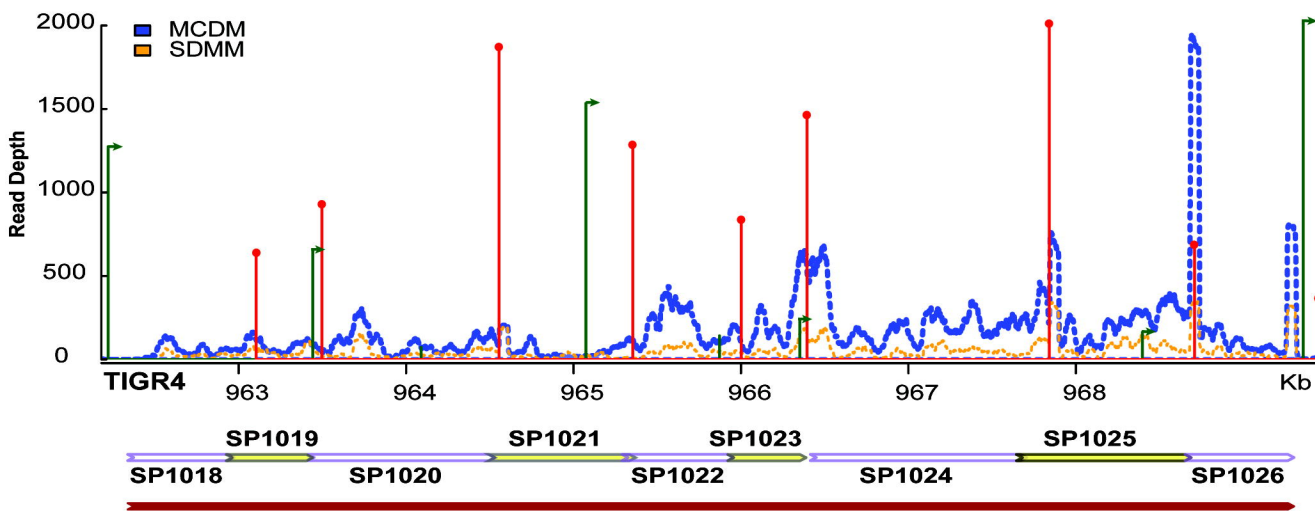**B**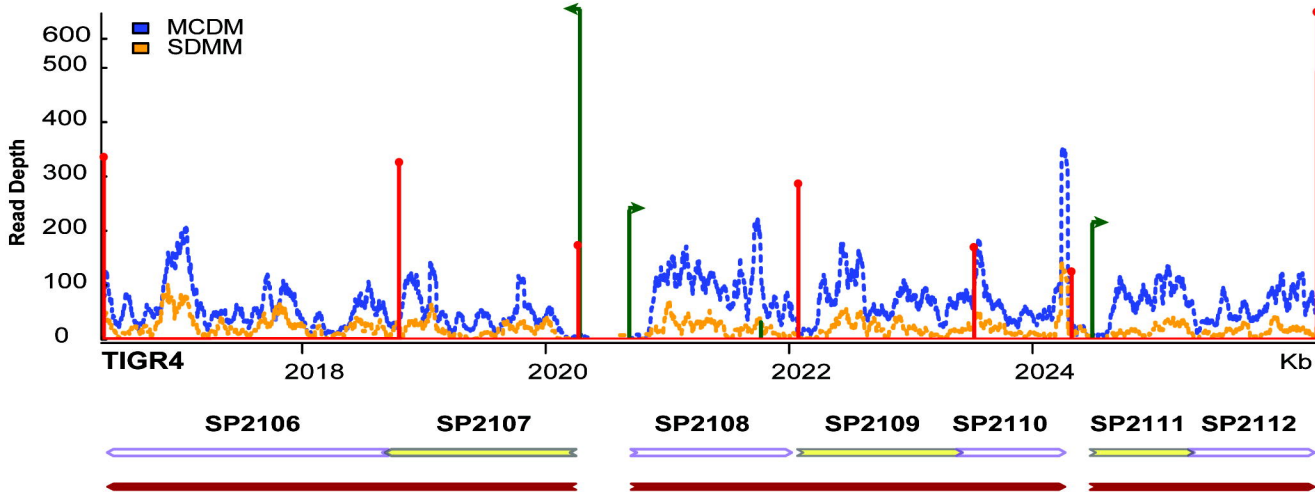

**A****FMN riboswitch**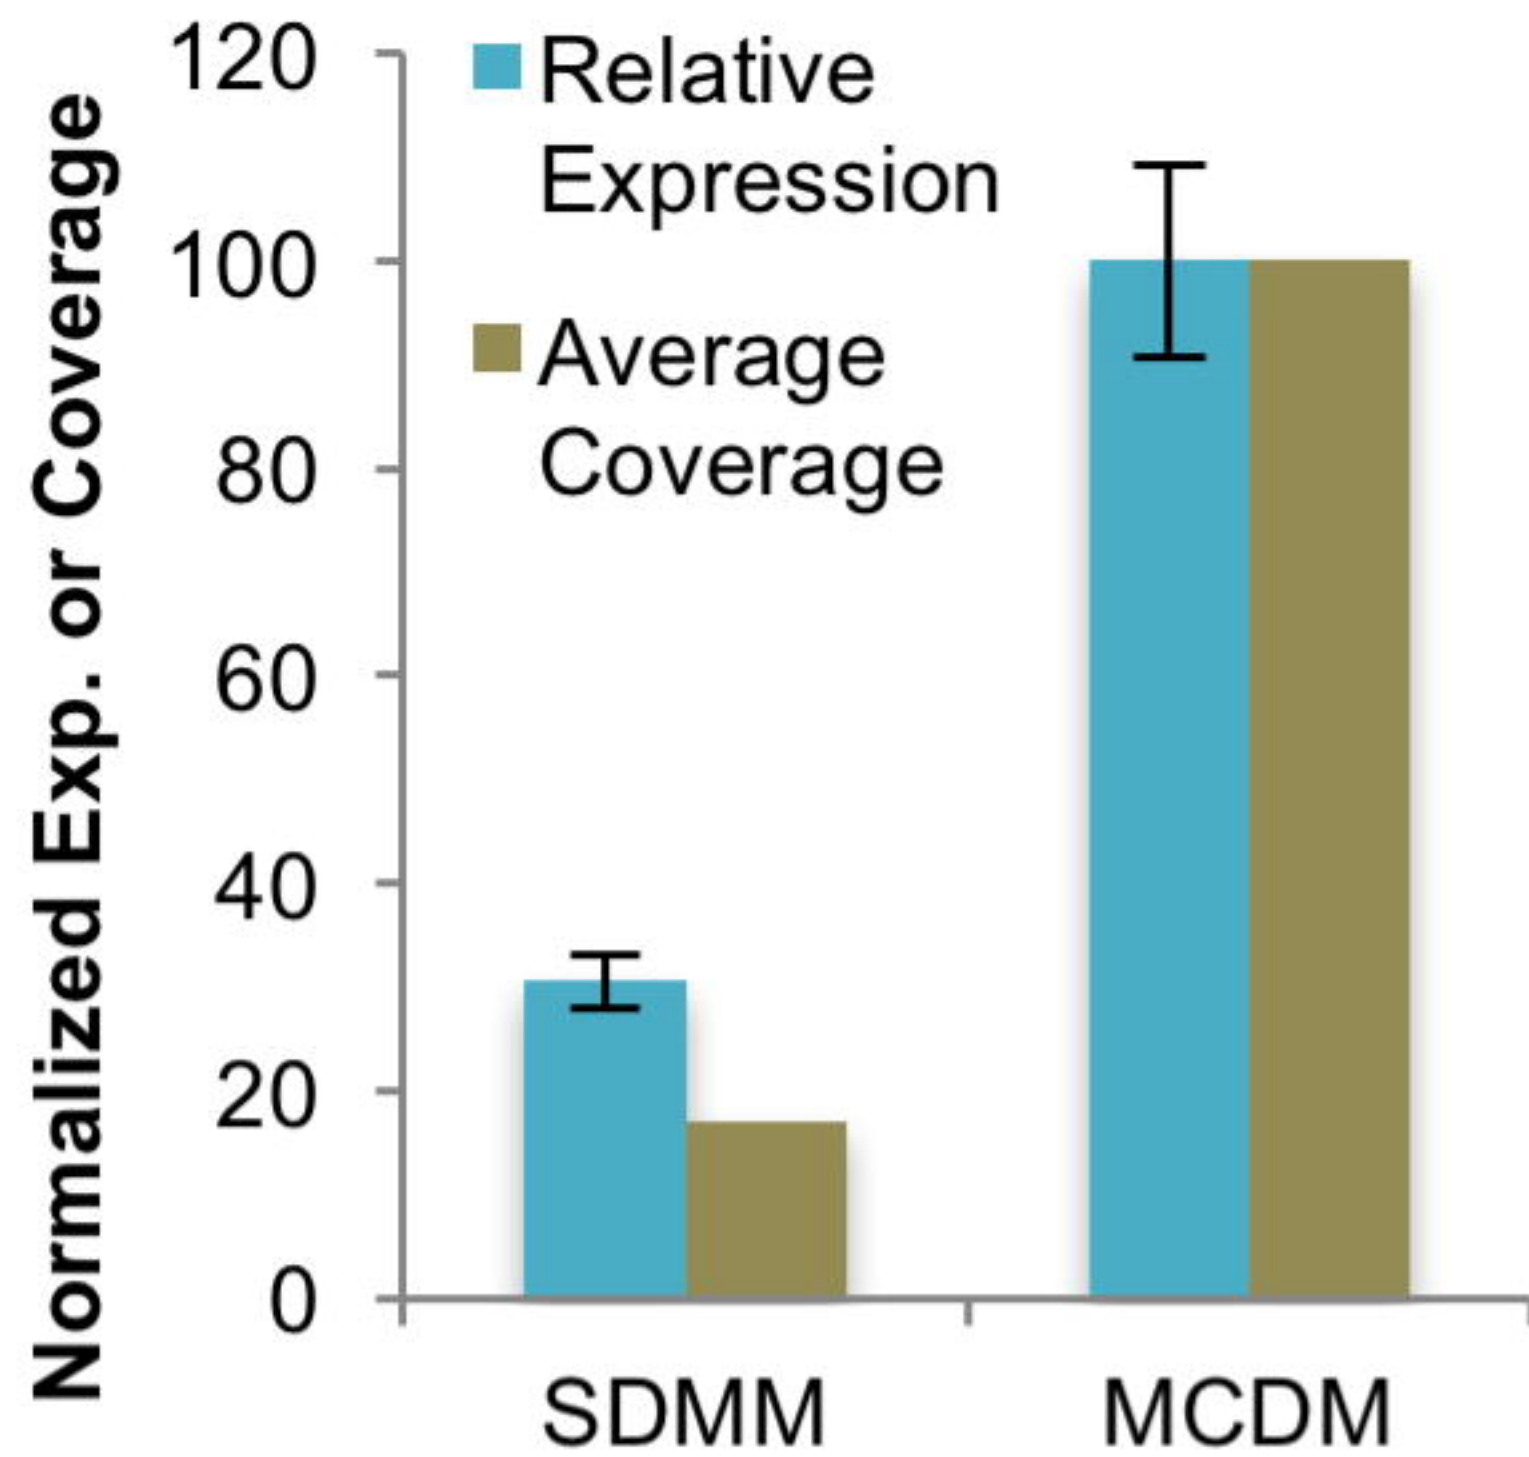

bioRxiv preprint doi: <https://doi.org/10.1101/286344>; this version posted March 21, 2018. The copyright holder for this preprint (which was not certified by peer review) is the author/funder, who has granted bioRxiv a license to display the preprint in perpetuity. It is made available under aCC-BY-NC-ND 4.0 International license.

**B****FMN riboswitch**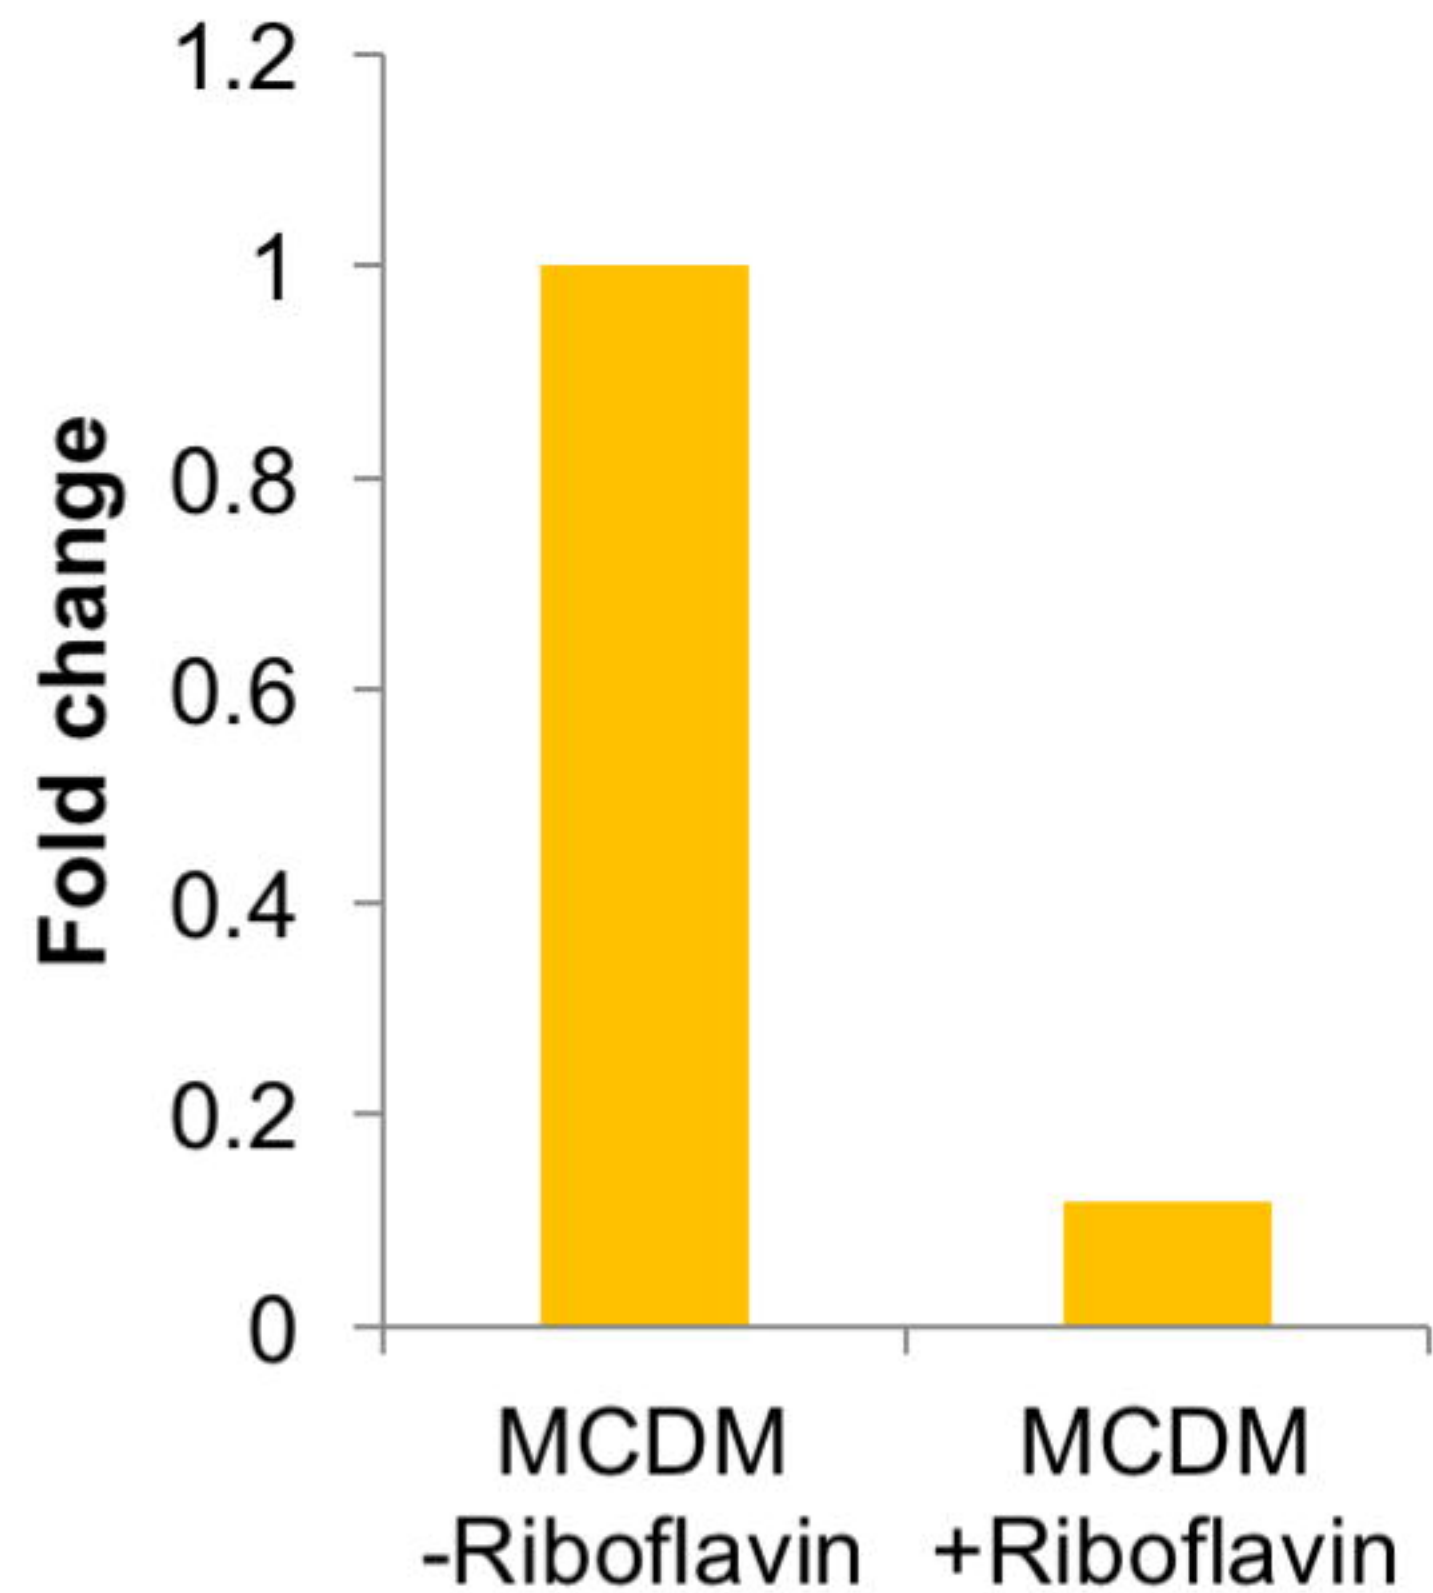**C****TPP riboswitch**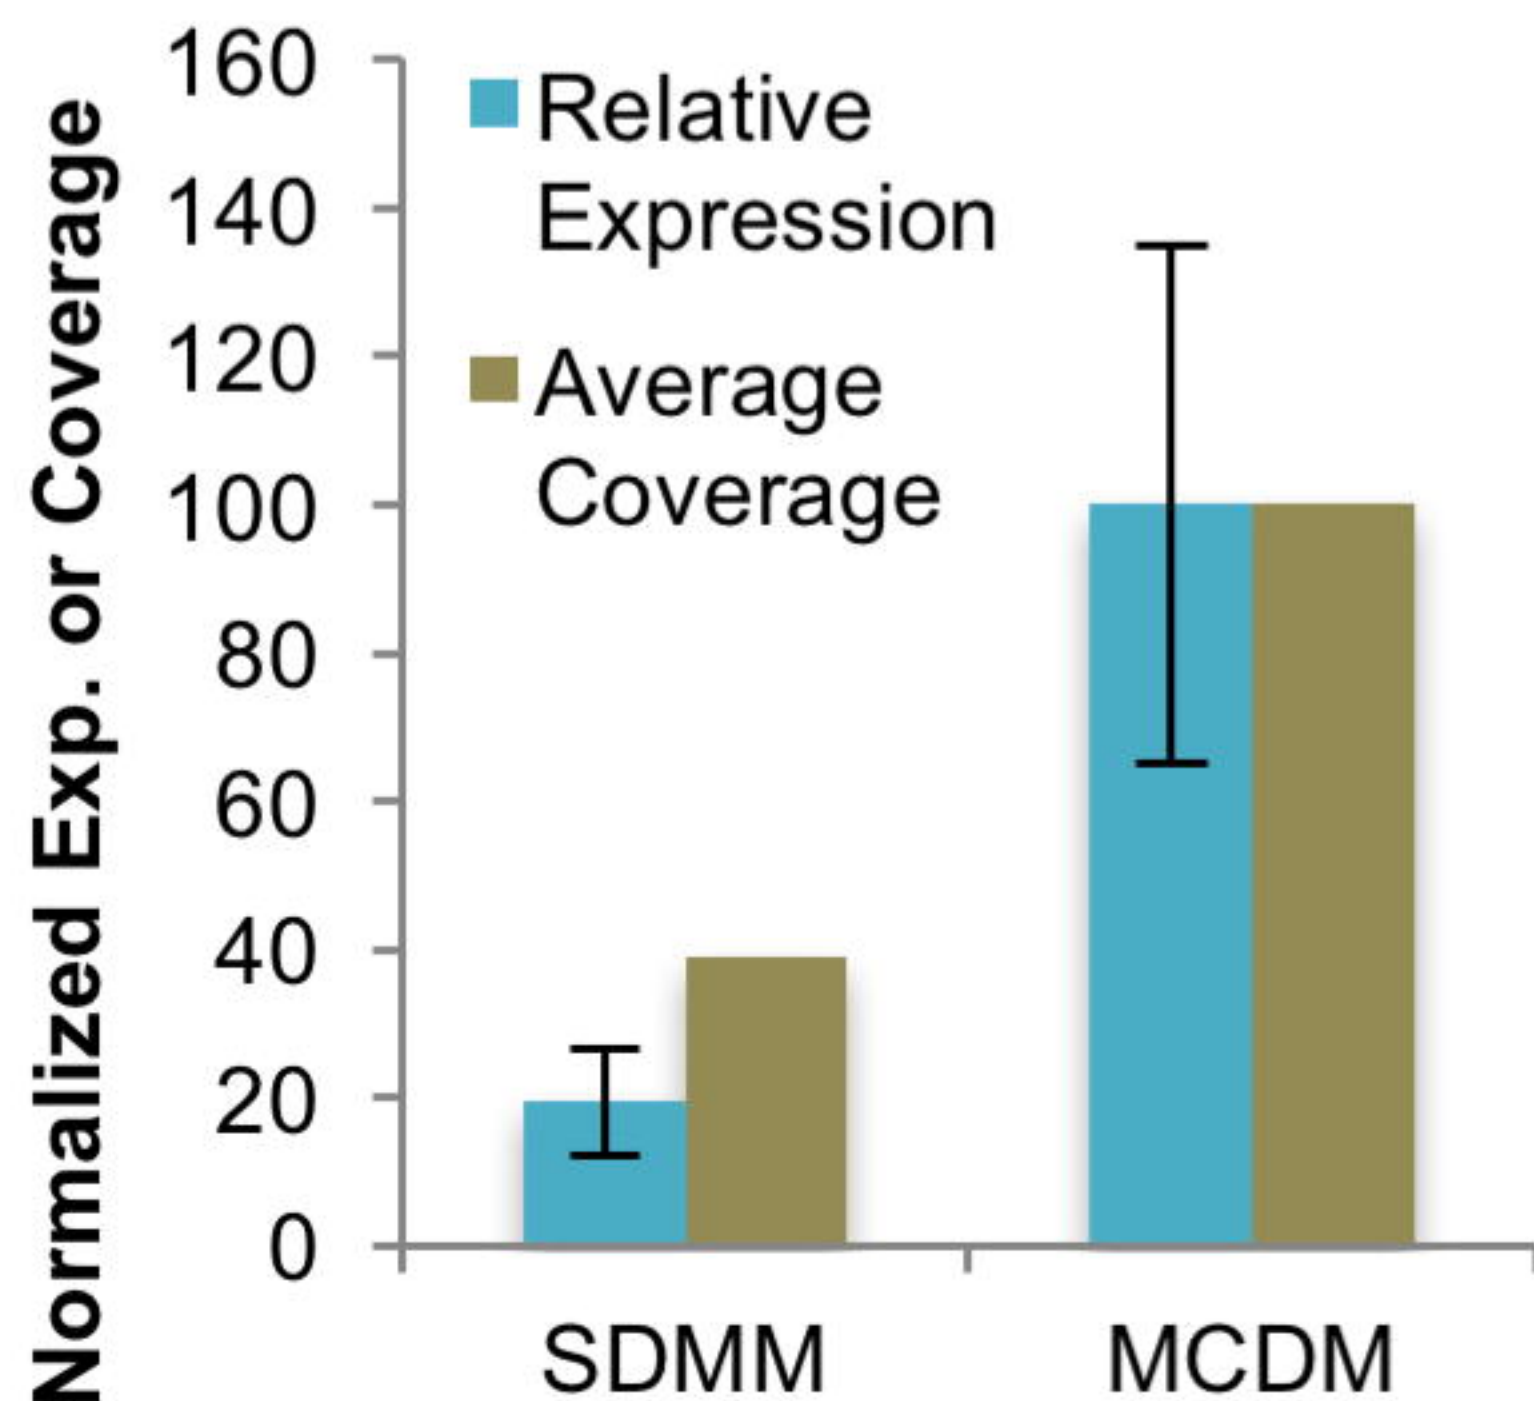**D****TPP riboswitch**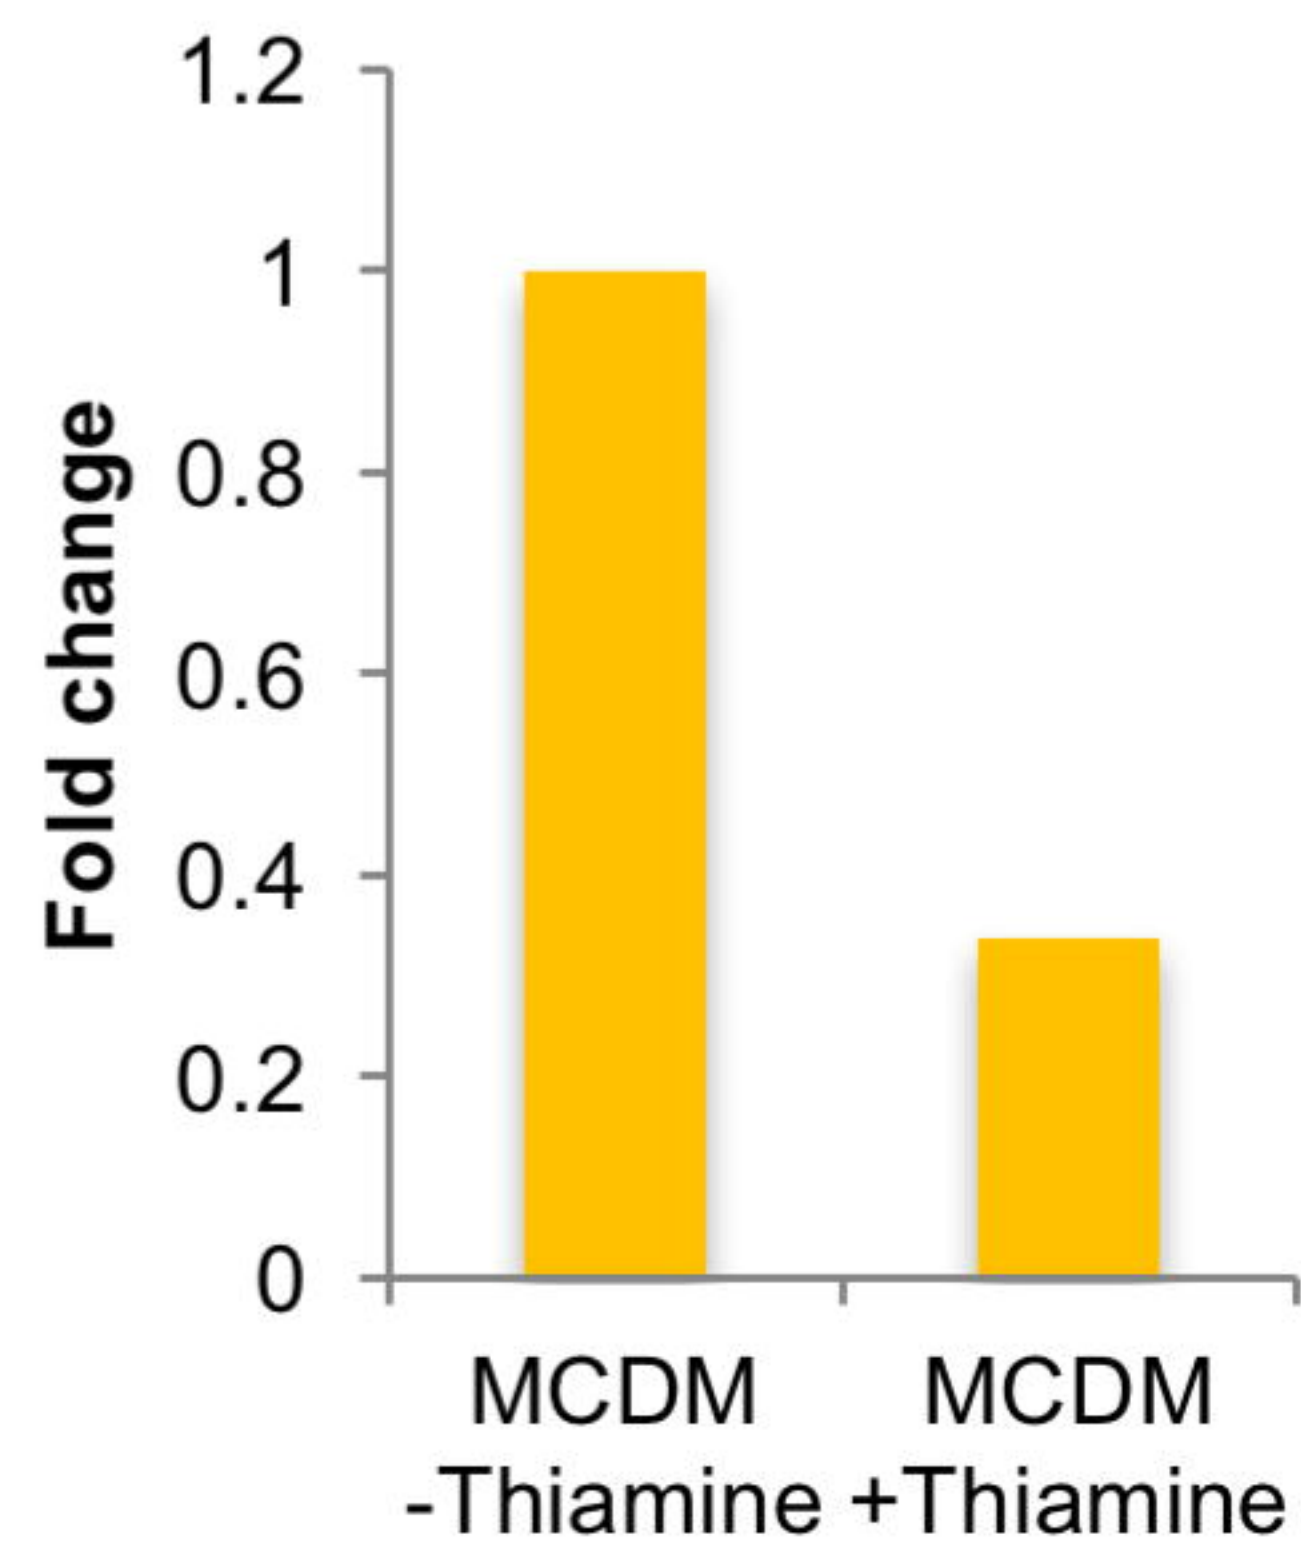

**A**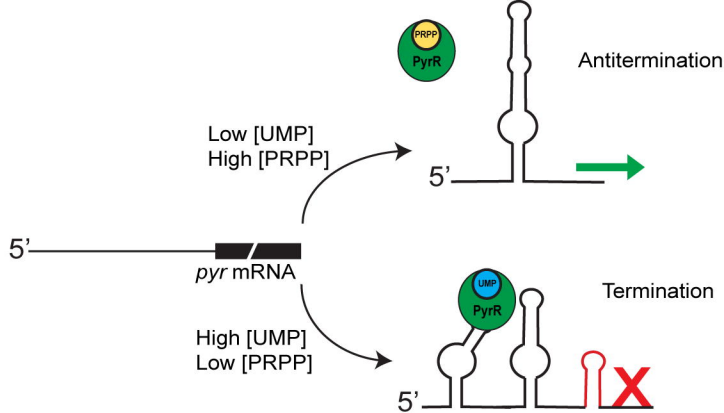**B**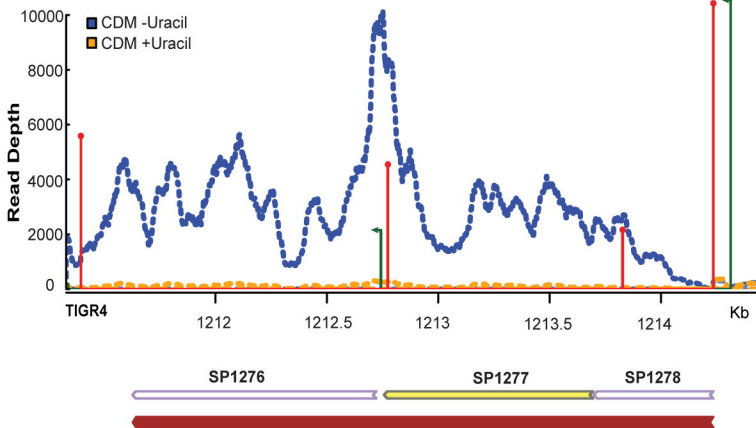**C**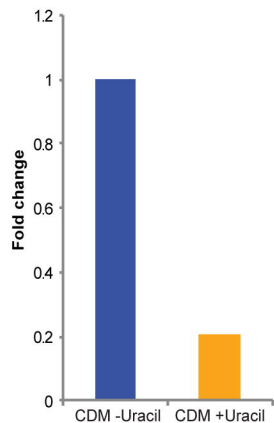

**A**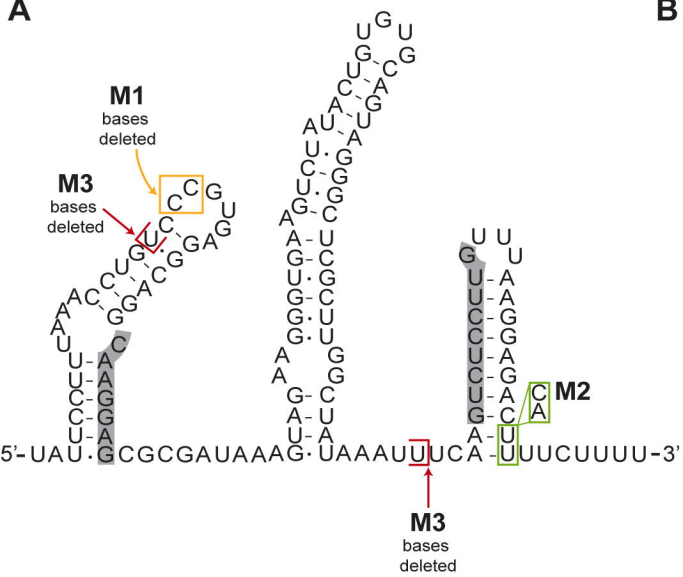**B**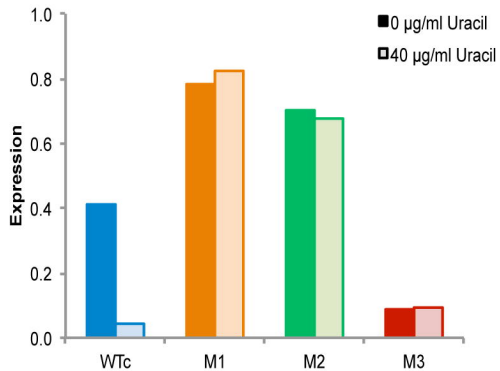

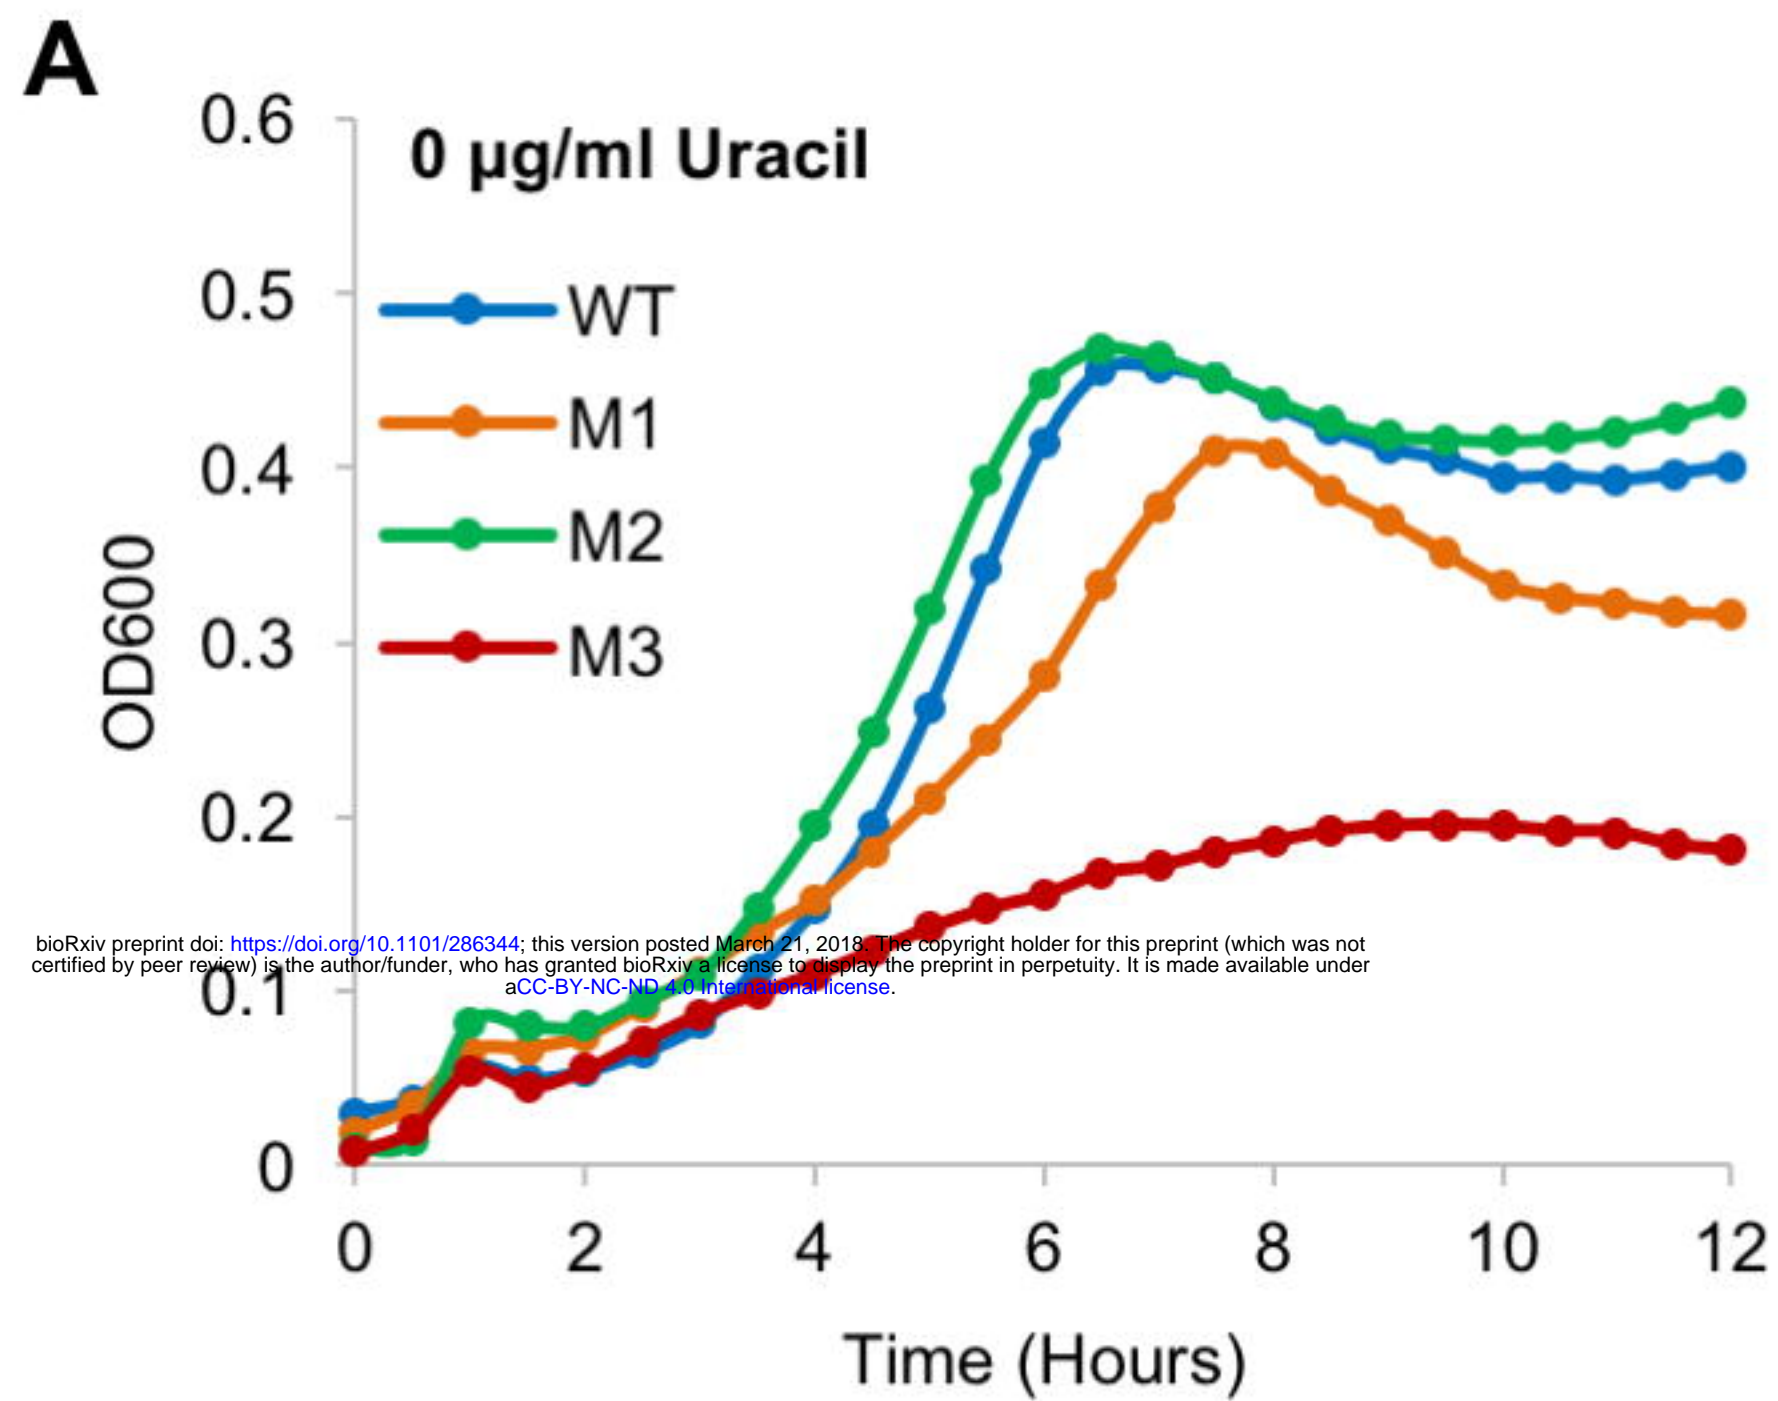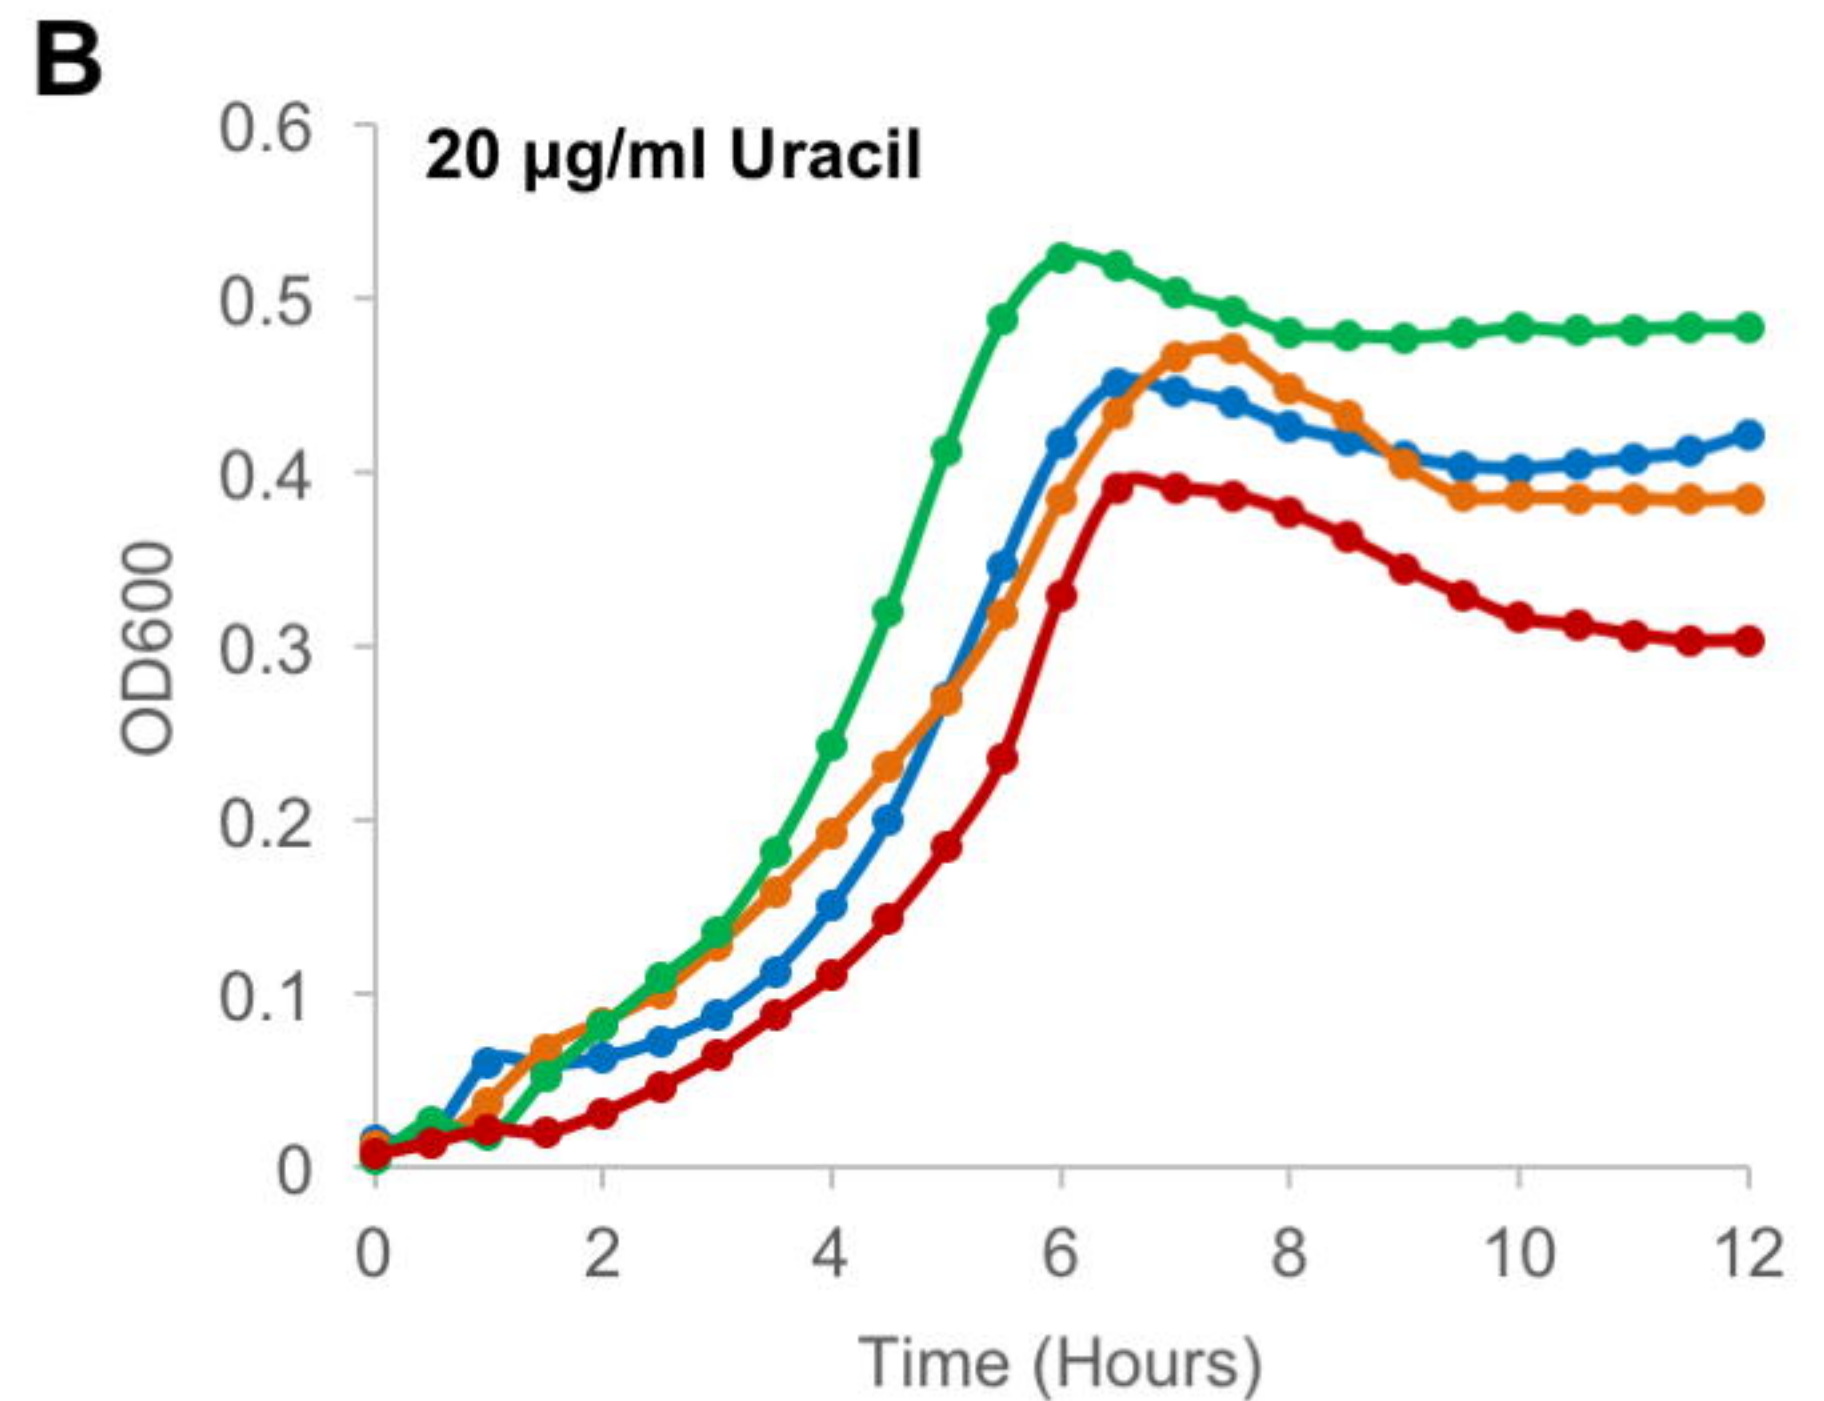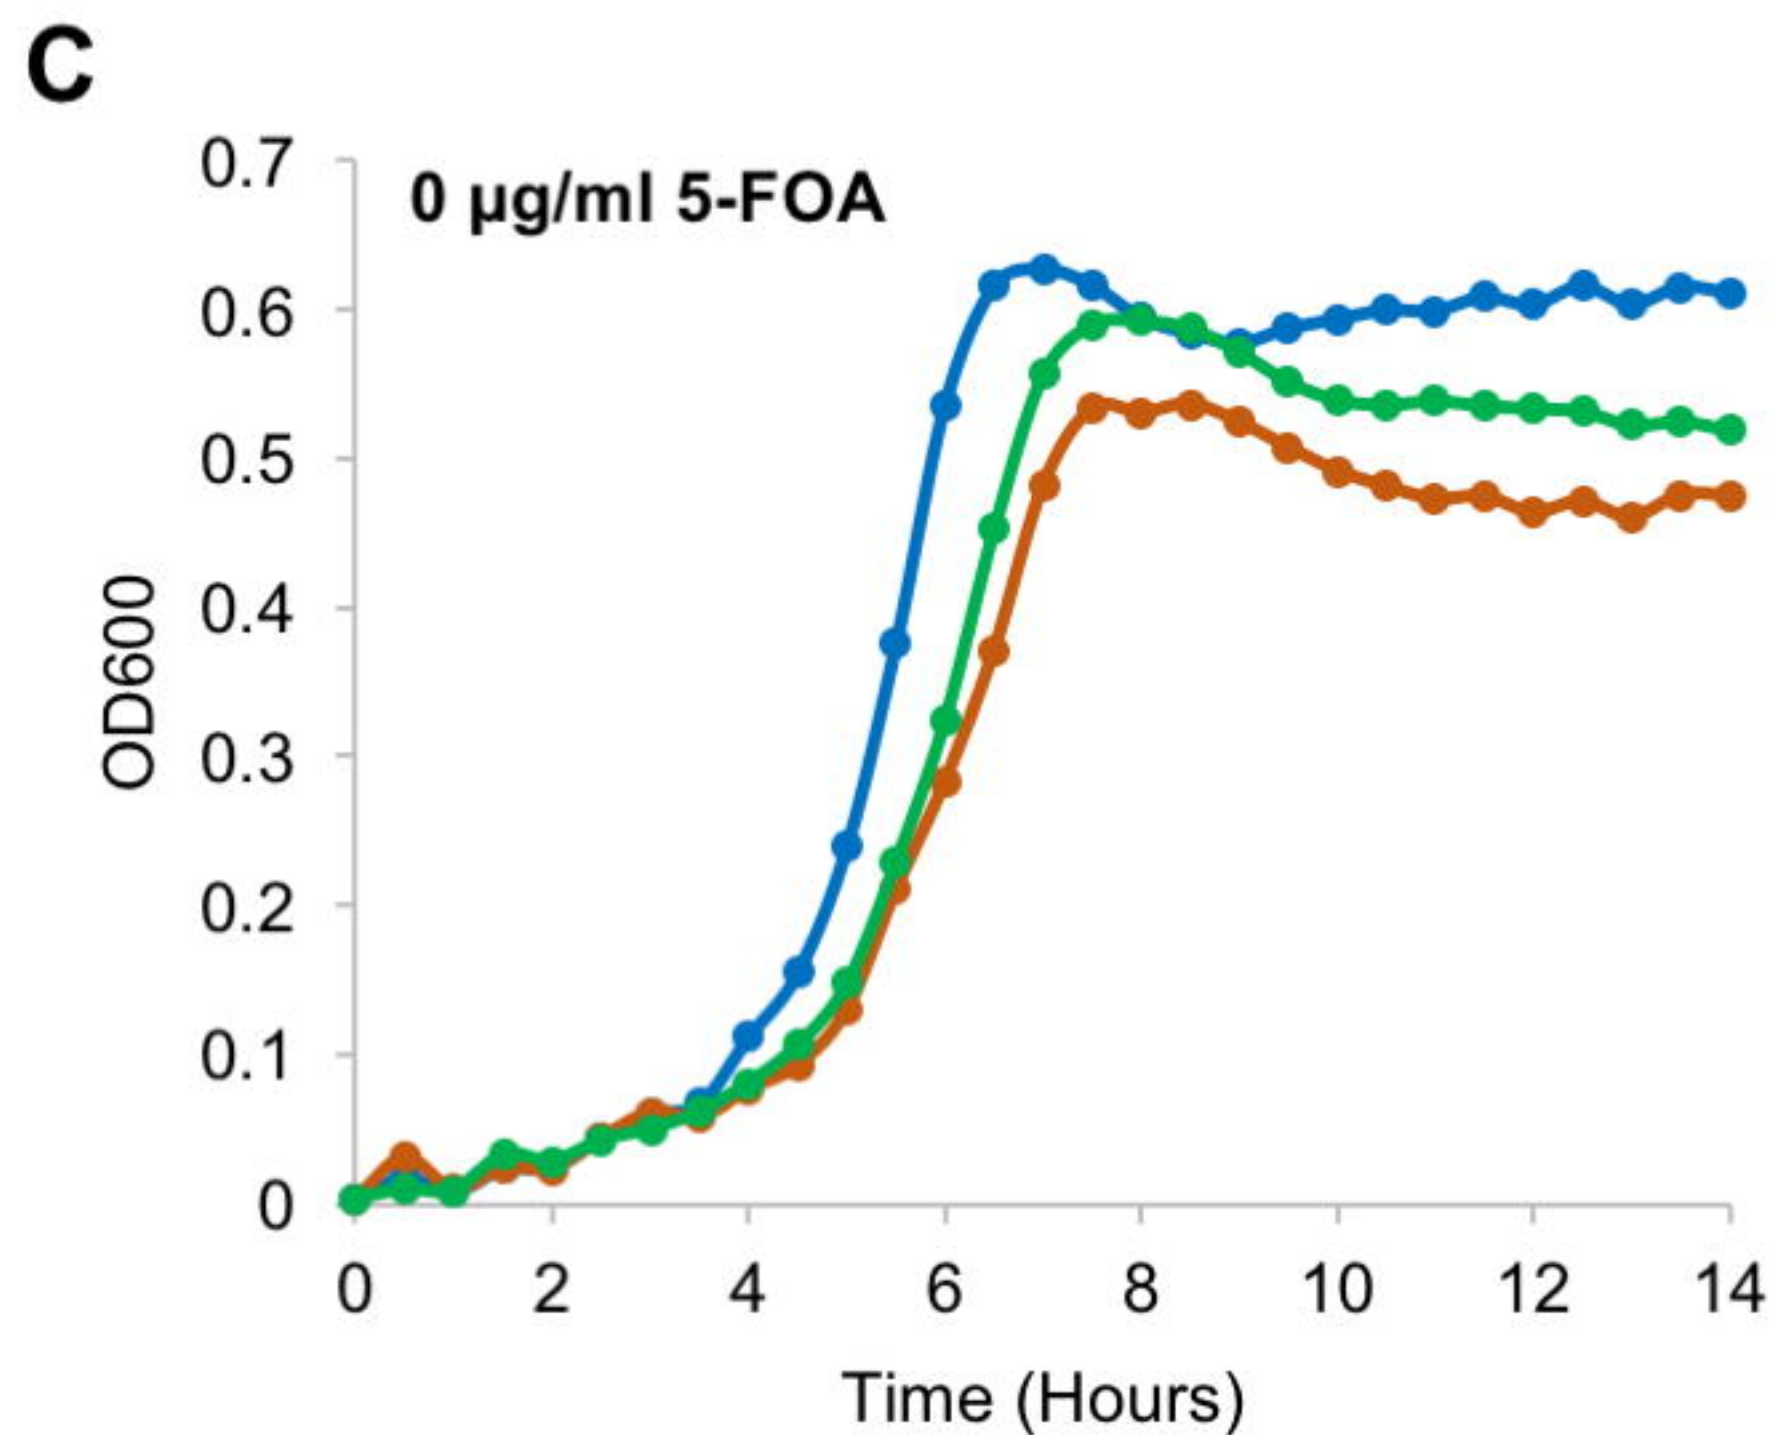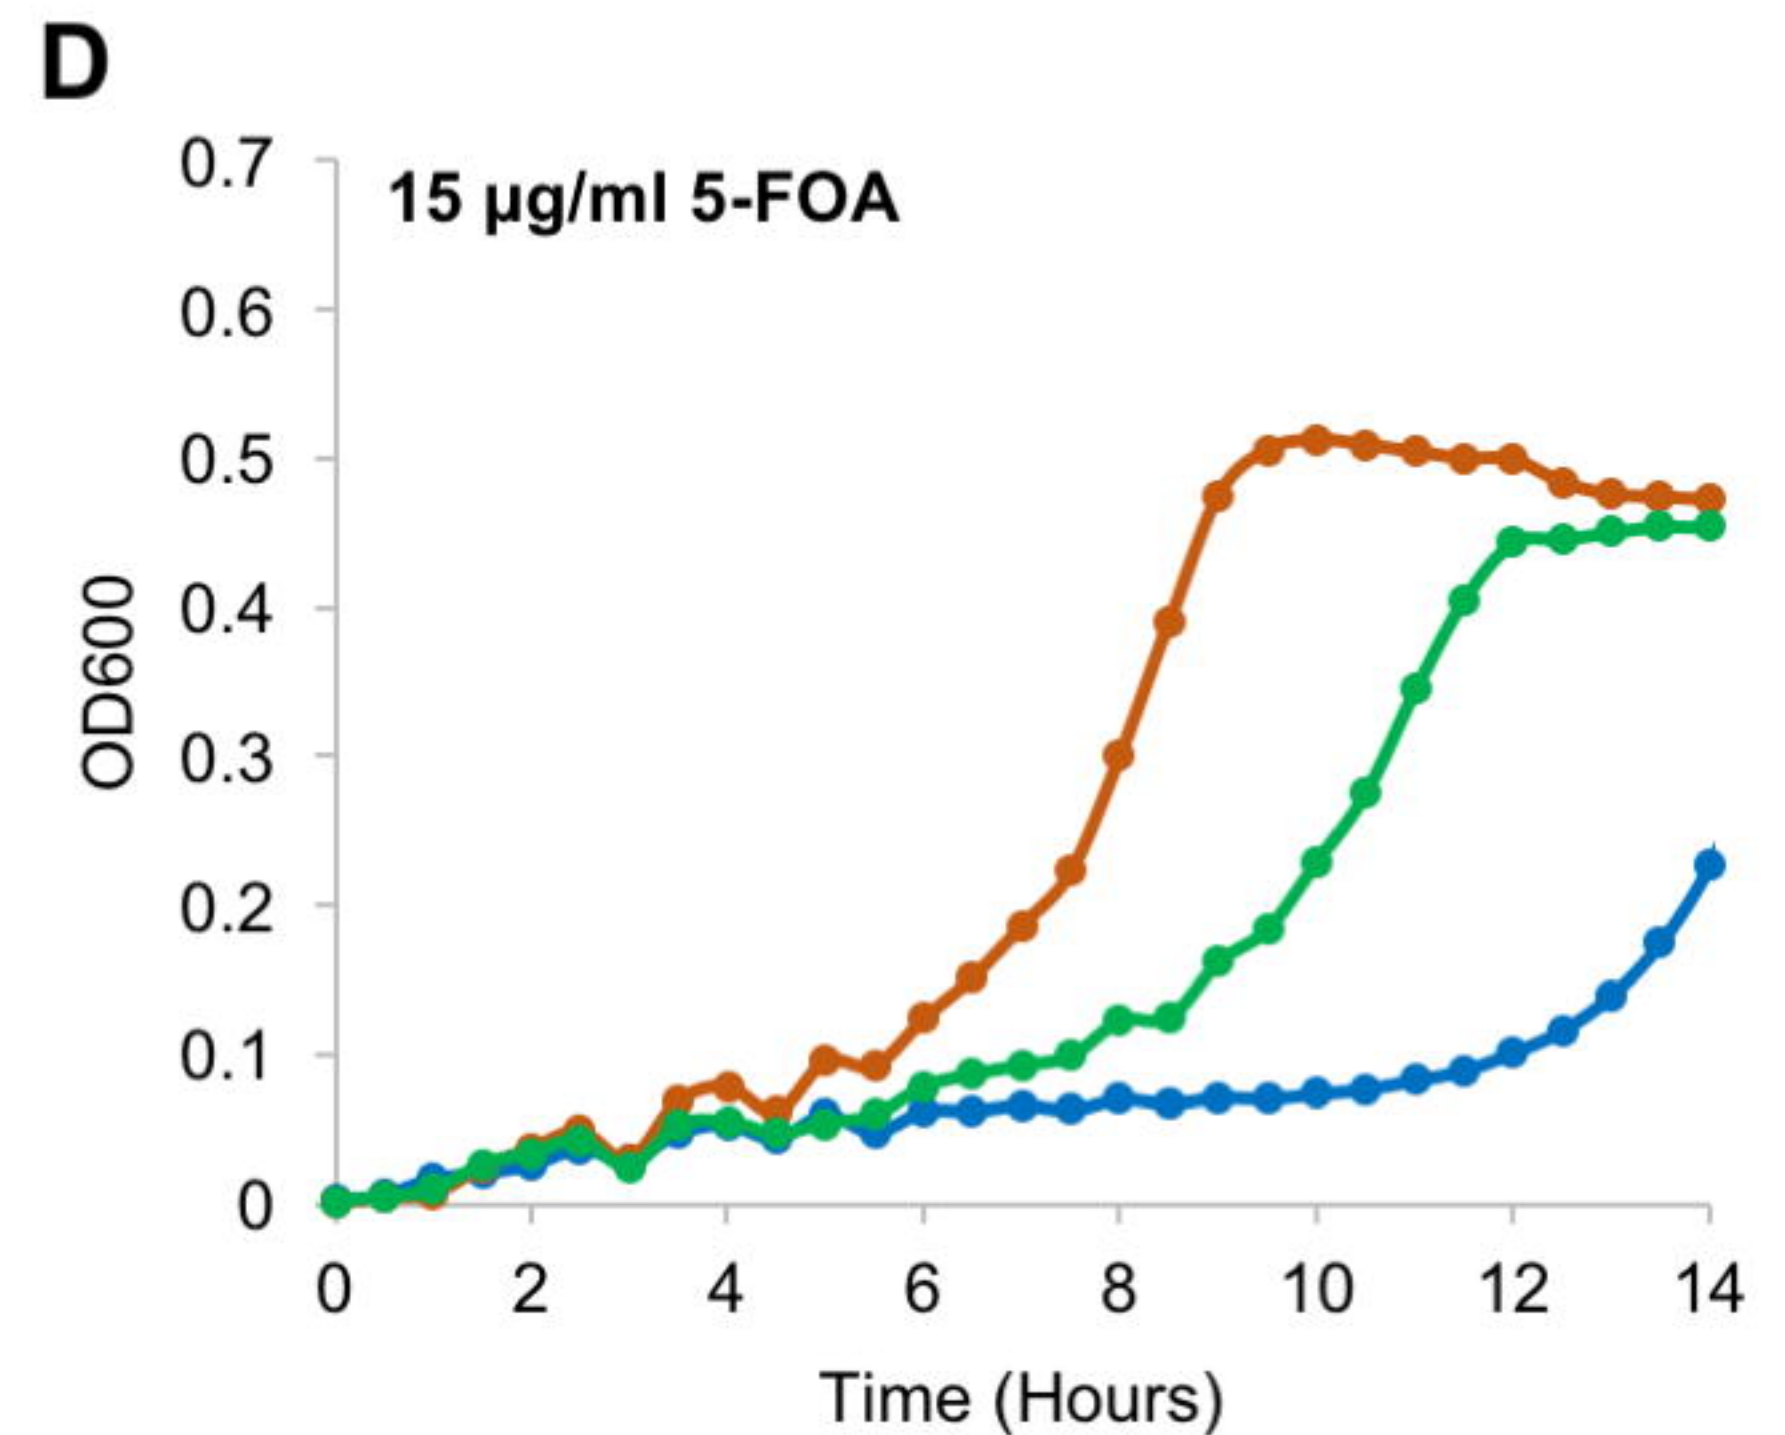

**A****M1**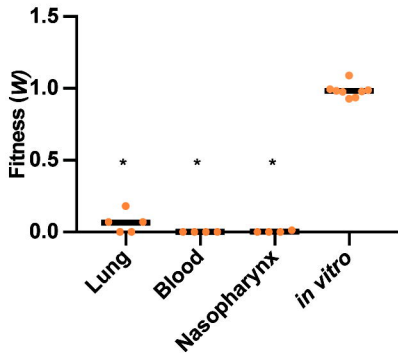**B****M2**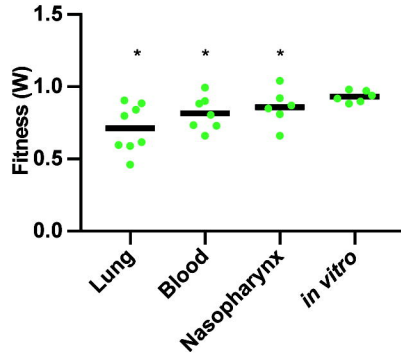**C****M3**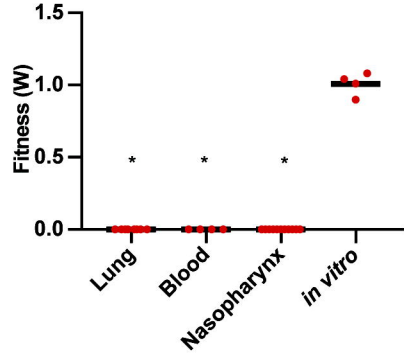

Source: https://www.biorxiv.org/content/10.1101/286344v1.full.pdf
